# Supplementary material for: Single-molecule, full-length transcript sequencing provides insight into the extreme metabolism of the ruby-throated hummingbird Archilochus colubris
Source: PubMed Central journal article supplement (PMC5869288; doi:10.1093/gigascience/giy009), 2018-02-15

# GigaScience

## Single molecule, full-length transcript sequencing provides insight into the extreme metabolism of ruby-throated hummingbird *Archilochus colubris* --Manuscript Draft--

|                                                      |                                                                                                                                                                                                                                                                                                                                                                                                                                                                                                                                                                                                                                                                                                                                                                                                                                                                                                                                                                                                                                                                                                                                                                                                                                                                                                                                                                                                                                                                                                                                                                                                                                                                                                                                                                                                                                                                                         |                      |
|------------------------------------------------------|-----------------------------------------------------------------------------------------------------------------------------------------------------------------------------------------------------------------------------------------------------------------------------------------------------------------------------------------------------------------------------------------------------------------------------------------------------------------------------------------------------------------------------------------------------------------------------------------------------------------------------------------------------------------------------------------------------------------------------------------------------------------------------------------------------------------------------------------------------------------------------------------------------------------------------------------------------------------------------------------------------------------------------------------------------------------------------------------------------------------------------------------------------------------------------------------------------------------------------------------------------------------------------------------------------------------------------------------------------------------------------------------------------------------------------------------------------------------------------------------------------------------------------------------------------------------------------------------------------------------------------------------------------------------------------------------------------------------------------------------------------------------------------------------------------------------------------------------------------------------------------------------|----------------------|
| <b>Manuscript Number:</b>                            | GIGA-D-17-00088R3                                                                                                                                                                                                                                                                                                                                                                                                                                                                                                                                                                                                                                                                                                                                                                                                                                                                                                                                                                                                                                                                                                                                                                                                                                                                                                                                                                                                                                                                                                                                                                                                                                                                                                                                                                                                                                                                       |                      |
| <b>Full Title:</b>                                   | Single molecule, full-length transcript sequencing provides insight into the extreme metabolism of ruby-throated hummingbird <i>Archilochus colubris</i>                                                                                                                                                                                                                                                                                                                                                                                                                                                                                                                                                                                                                                                                                                                                                                                                                                                                                                                                                                                                                                                                                                                                                                                                                                                                                                                                                                                                                                                                                                                                                                                                                                                                                                                                |                      |
| <b>Article Type:</b>                                 | Data Note                                                                                                                                                                                                                                                                                                                                                                                                                                                                                                                                                                                                                                                                                                                                                                                                                                                                                                                                                                                                                                                                                                                                                                                                                                                                                                                                                                                                                                                                                                                                                                                                                                                                                                                                                                                                                                                                               |                      |
| <b>Funding Information:</b>                          | Human Frontier Science Program (#RGP0062/2016)                                                                                                                                                                                                                                                                                                                                                                                                                                                                                                                                                                                                                                                                                                                                                                                                                                                                                                                                                                                                                                                                                                                                                                                                                                                                                                                                                                                                                                                                                                                                                                                                                                                                                                                                                                                                                                          | Dr. Kenneth C. Welch |
|                                                      | Natural Sciences and Engineering Research Council of Canada (CA) (#386466)                                                                                                                                                                                                                                                                                                                                                                                                                                                                                                                                                                                                                                                                                                                                                                                                                                                                                                                                                                                                                                                                                                                                                                                                                                                                                                                                                                                                                                                                                                                                                                                                                                                                                                                                                                                                              | Dr. Kenneth C. Welch |
| <b>Abstract:</b>                                     | <p><b>Background</b><br/>Hummingbirds oxidize ingested nectar sugars directly to fuel foraging but cannot sustain this fuel use during fasting periods, such as during the night or during long-distance migratory flights. Instead, fasting hummingbirds switch to oxidizing stored lipids, derived from ingested sugars. The hummingbird liver plays a key role in moderating energy homeostasis and this remarkable capacity for fuel switching. Additionally, liver is the principle location of de novo lipogenesis, which can occur at exceptionally high rates, such as during premigratory fattening. Yet understanding how this tissue and whole organism moderates energy turnover is hampered by a lack of information regarding how relevant enzymes differ in sequence, expression, and regulation.</p> <p><b>Findings</b><br/>We generated a de novo transcriptome of the hummingbird liver using PacBio full-length cDNA sequencing (Iso-Seq), yielding a total of 8.6Gb of sequencing data, or 2.6M reads from 4 different size fractions. We analyzed data using the SMRTAnalysis v3.1 Iso-Seq pipeline, then clustered isoforms into gene families to generate de novo gene contigs using Cogent. We performed orthology analysis to identify closely related sequences between our transcriptome and other avian and human gene sets. Finally, we closely examined homology of critical lipid metabolism genes between our transcriptome data and avian and human genomes.</p> <p><b>Conclusions</b><br/>We confirmed high levels of sequence divergence within hummingbird lipogenic enzymes, suggesting a high probability of adaptive divergent function in the hepatic lipogenic pathways. Our results leverage cutting-edge technology and a novel bioinformatics pipeline to provide a first direct look at the transcriptome of this incredible organism.</p> |                      |
| <b>Corresponding Author:</b>                         | Winston Timp<br>Johns Hopkins University<br>Baltimore, Maryland UNITED STATES                                                                                                                                                                                                                                                                                                                                                                                                                                                                                                                                                                                                                                                                                                                                                                                                                                                                                                                                                                                                                                                                                                                                                                                                                                                                                                                                                                                                                                                                                                                                                                                                                                                                                                                                                                                                           |                      |
| <b>Corresponding Author Secondary Information:</b>   |                                                                                                                                                                                                                                                                                                                                                                                                                                                                                                                                                                                                                                                                                                                                                                                                                                                                                                                                                                                                                                                                                                                                                                                                                                                                                                                                                                                                                                                                                                                                                                                                                                                                                                                                                                                                                                                                                         |                      |
| <b>Corresponding Author's Institution:</b>           | Johns Hopkins University                                                                                                                                                                                                                                                                                                                                                                                                                                                                                                                                                                                                                                                                                                                                                                                                                                                                                                                                                                                                                                                                                                                                                                                                                                                                                                                                                                                                                                                                                                                                                                                                                                                                                                                                                                                                                                                                |                      |
| <b>Corresponding Author's Secondary Institution:</b> |                                                                                                                                                                                                                                                                                                                                                                                                                                                                                                                                                                                                                                                                                                                                                                                                                                                                                                                                                                                                                                                                                                                                                                                                                                                                                                                                                                                                                                                                                                                                                                                                                                                                                                                                                                                                                                                                                         |                      |
| <b>First Author:</b>                                 | Rachael E. Workman                                                                                                                                                                                                                                                                                                                                                                                                                                                                                                                                                                                                                                                                                                                                                                                                                                                                                                                                                                                                                                                                                                                                                                                                                                                                                                                                                                                                                                                                                                                                                                                                                                                                                                                                                                                                                                                                      |                      |
| <b>First Author Secondary Information:</b>           |                                                                                                                                                                                                                                                                                                                                                                                                                                                                                                                                                                                                                                                                                                                                                                                                                                                                                                                                                                                                                                                                                                                                                                                                                                                                                                                                                                                                                                                                                                                                                                                                                                                                                                                                                                                                                                                                                         |                      |
| <b>Order of Authors:</b>                             | Rachael E. Workman<br>Alexander M. Myrka<br>Elizabeth Tseng<br>G. William Wong                                                                                                                                                                                                                                                                                                                                                                                                                                                                                                                                                                                                                                                                                                                                                                                                                                                                                                                                                                                                                                                                                                                                                                                                                                                                                                                                                                                                                                                                                                                                                                                                                                                                                                                                                                                                          |                      |

|                                                                                                                                                                                                                                                                                                                                                                                                                                                                                                                                     |                                                                                                                                                                                                                                                                                                                                                                                                                                                                                                                                                                     |
|-------------------------------------------------------------------------------------------------------------------------------------------------------------------------------------------------------------------------------------------------------------------------------------------------------------------------------------------------------------------------------------------------------------------------------------------------------------------------------------------------------------------------------------|---------------------------------------------------------------------------------------------------------------------------------------------------------------------------------------------------------------------------------------------------------------------------------------------------------------------------------------------------------------------------------------------------------------------------------------------------------------------------------------------------------------------------------------------------------------------|
|                                                                                                                                                                                                                                                                                                                                                                                                                                                                                                                                     | Kenneth C. Welch                                                                                                                                                                                                                                                                                                                                                                                                                                                                                                                                                    |
|                                                                                                                                                                                                                                                                                                                                                                                                                                                                                                                                     | Winston Timp                                                                                                                                                                                                                                                                                                                                                                                                                                                                                                                                                        |
| <b>Order of Authors Secondary Information:</b>                                                                                                                                                                                                                                                                                                                                                                                                                                                                                      |                                                                                                                                                                                                                                                                                                                                                                                                                                                                                                                                                                     |
| <b>Response to Reviewers:</b>                                                                                                                                                                                                                                                                                                                                                                                                                                                                                                       | <p>As per editorial instructions, we have:</p> <ol style="list-style-type: none"> <li>1) Included citations to the GigaDB and ZENODO datasets wehre appropriate</li> <li>2) Removed the sentence "All other data available upon request"</li> <li>3) Added the MIT license to our github repo</li> <li>4) Added a statement to the manuscript involving the approval for research with animals (Candian Wildlife Service permit and UToronto AUP).</li> </ol> <p>2/5/18</p> <ol style="list-style-type: none"> <li>5) Fixed the references 28, 29 and 38</li> </ol> |
| <b>Additional Information:</b>                                                                                                                                                                                                                                                                                                                                                                                                                                                                                                      |                                                                                                                                                                                                                                                                                                                                                                                                                                                                                                                                                                     |
| <b>Question</b>                                                                                                                                                                                                                                                                                                                                                                                                                                                                                                                     | <b>Response</b>                                                                                                                                                                                                                                                                                                                                                                                                                                                                                                                                                     |
| Are you submitting this manuscript to a special series or article collection?                                                                                                                                                                                                                                                                                                                                                                                                                                                       | No                                                                                                                                                                                                                                                                                                                                                                                                                                                                                                                                                                  |
| <p><b>Experimental design and statistics</b></p> <p>Full details of the experimental design and statistical methods used should be given in the Methods section, as detailed in our <a href="#">Minimum Standards Reporting Checklist</a>. Information essential to interpreting the data presented should be made available in the figure legends.</p> <p>Have you included all the information requested in your manuscript?</p>                                                                                                  | Yes                                                                                                                                                                                                                                                                                                                                                                                                                                                                                                                                                                 |
| <p><b>Resources</b></p> <p>A description of all resources used, including antibodies, cell lines, animals and software tools, with enough information to allow them to be uniquely identified, should be included in the Methods section. Authors are strongly encouraged to cite <a href="#">Research Resource Identifiers</a> (RRIDs) for antibodies, model organisms and tools, where possible.</p> <p>Have you included the information requested as detailed in our <a href="#">Minimum Standards Reporting Checklist</a>?</p> | Yes                                                                                                                                                                                                                                                                                                                                                                                                                                                                                                                                                                 |
| <p><b>Availability of data and materials</b></p> <p>All datasets and code on which the conclusions of the paper rely must be either included in your submission or deposited in <a href="#">publicly available repositories</a></p>                                                                                                                                                                                                                                                                                                 | Yes                                                                                                                                                                                                                                                                                                                                                                                                                                                                                                                                                                 |

(where available and ethically appropriate), referencing such data using a unique identifier in the references and in the “Availability of Data and Materials” section of your manuscript.

Have you have met the above requirement as detailed in our [Minimum Standards Reporting Checklist?](#)

1  
2  
3  
4 **Single molecule, full-length transcript sequencing provides insight into the extreme**  
5 **metabolism of ruby-throated hummingbird *Archilochus colubris***  
6

7  
8 Rachael E. Workman<sup>1\*</sup>, Alexander M. Myrka<sup>2\*</sup>, Elizabeth Tseng<sup>4</sup>, G. William Wong<sup>3</sup>, Kenneth C.  
9 Welch Jr.<sup>2+</sup>, and Winston Timp<sup>1+</sup>  
10

11 <sup>1</sup> Department of Biomedical Engineering, Johns Hopkins University, Baltimore, MD, USA

12 <sup>2</sup> Department of Biological Sciences, University of Toronto Scarborough, Toronto, Ontario,  
13 Canada and Department of Cell & Systems Biology, University of Toronto, Toronto, Ontario,  
14 Canada  
15

16 <sup>3</sup> Department of Physiology and Center for Metabolism and Obesity Research, Johns Hopkins  
17 University School of Medicine, Baltimore, MD, USA

18 <sup>4</sup> Pacific Biosciences, Menlo Park, California, USA

19 \* Co-first author

20 + Co-Corresponding author  
21  
22  
23  
24  
25  
26  
27  
28  
29  
30  
31  
32  
33  
34  
35  
36  
37  
38  
39  
40  
41  
42  
43  
44  
45  
46  
47  
48  
49  
50  
51  
52  
53  
54  
55  
56  
57  
58  
59  
60  
61  
62  
63  
64  
65

1  
2  
3  
4  
5  
6 **Abstract**

7  
8 **Background**

9  
10 Hummingbirds oxidize ingested nectar sugars directly to fuel foraging but cannot sustain this  
11 fuel use during fasting periods, such as during the night or during long-distance migratory  
12 flights. Instead, fasting hummingbirds switch to oxidizing stored lipids, derived from ingested  
13 sugars. The hummingbird liver plays a key role in moderating energy homeostasis and this  
14 remarkable capacity for fuel switching. Additionally, liver is the principle location of *de novo*  
15 lipogenesis, which can occur at exceptionally high rates, such as during premigratory fattening.  
16 Yet understanding how this tissue and whole organism moderates energy turnover is hampered  
17 by a lack of information regarding how relevant enzymes differ in sequence, expression, and  
18 regulation.  
19  
20  
21  
22

23 **Findings**

24  
25 We generated a *de novo* transcriptome of the hummingbird liver using PacBio full-length cDNA  
26 sequencing (Iso-Seq), yielding a total of 8.6Gb of sequencing data, or 2.6M reads from 4  
27 different size fractions. We analyzed data using the SMRTAnalysis v3.1 Iso-Seq pipeline, then  
28 clustered isoforms into gene families to generate *de novo* gene contigs using Cogent. We  
29 performed orthology analysis to identify closely related sequences between our transcriptome  
30 and other avian and human gene sets. Finally, we closely examined homology of critical lipid  
31 metabolism genes between our transcriptome data and avian and human genomes.  
32  
33  
34

35 **Conclusions**

36  
37 We confirmed high levels of sequence divergence within hummingbird lipogenic enzymes,  
38 suggesting a high probability of adaptive divergent function in the hepatic lipogenic pathways.  
39 Our results leverage cutting-edge technology and a novel bioinformatics pipeline to provide a  
40 first direct look at the transcriptome of this incredible organism.  
41  
42

43 **Keywords**

44  
45 Pacbio; single molecule sequencing; Iso-seq; transcriptome; liver; metabolism; hummingbirds  
46  
47

48 **Data Description**

49 *Background*

50  
51 Hummingbirds are the only avian group to engage in sustained hovering flight as a means for  
52 accessing floral nectar, their primary caloric energy source. While hovering, small  
53 hummingbirds, such as the ruby-throated hummingbird (*Archilochus colubris*), achieve some of  
54 the highest mass-specific metabolic rates observed among vertebrates [1,2]. Given their  
55 specialized, sugar-rich diet, it is not that surprising that hummingbirds are able to fuel this  
56 intense form of exercise exclusively by oxidizing carbohydrates [3,4]. This energetic feat is also  
57 remarkable in that the source of sugar oxidized by flight muscles during hovering is the same  
58  
59  
60  
61  
62  
63  
64  
65

1  
2  
3  
4 sugar ingested in nectar meals only minutes prior [4,5]. In addition, hummingbirds seem equally  
5 adept at relying on either glucose or fructose (the two monosaccharides comprising their nectar)  
6 [6] as a metabolic fuel for flight [4]. In doing so, they achieve rates of sugar flux through their  
7 bodies that are up to 55x greater than non-flying mammals [7].  
8  
9

10 Hummingbird flight is not always a solely carbohydrate-fueled endeavor. Lipids are a more  
11 energy dense form of fuel storage, and fasted hummingbirds are as capable of fueling hovering  
12 flight via the oxidation of onboard lipid stores as they are dietary sugars [5]. Lipids are likely the  
13 sole or predominant fuel used during overnight periods [8]. Just as flux of sugar through the  
14 hummingbird is extremely rapid, the building of lipid stores from dietary sugar is also rapid when  
15 needed. For example, ruby-throated hummingbirds can routinely increase their mass by 15% or  
16 more between midday and dusk on a given day [9]. The ruby-throated hummingbird (*A. colubris*)  
17 completes an arduous annual migratory journey from breeding grounds as far north as Quebec  
18 in Canada to wintering grounds in Central America [10]. Hummingbirds are constrained to  
19 fueling long distance migratory flights using onboard lipids. In preparing for such flights, some  
20 individuals rapidly build fat stores prior to departure or at migratory stopover points, increasing  
21 their mass by 25-40% in as few as four days [9,11,12].  
22  
23  
24  
25

26 The ability to switch so completely and quickly between fuel types means these animals  
27 possess exquisite control over rates of substrate metabolism and biosynthesis in the liver, the  
28 principal site of lipogenesis in birds [13]. While hummingbird liver does indeed exhibit  
29 remarkably high activities of lipogenic and other metabolic enzymes [14], the mechanisms  
30 underlying high catalytic rates (high catalytic efficiency and/or high levels of enzyme expression)  
31 and control over flux (the role of hierarchical versus metabolic control), remain unclear.  
32  
33  
34

35 Despite long-standing recognition of, and interest in, their extreme metabolism, the lack of  
36 knowledge about gene and protein sequences in hummingbirds has limited more detailed and  
37 mechanistic analyses. Amplification of hummingbird genetic sequences for sequencing and/or  
38 cloning is hampered by the lack of sequence information from closely related groups, making  
39 well-targeted primer design difficult. Only two genes have thus far been cloned from any  
40 hummingbird: an uncoupling protein (UCP) homolog and insulin [15,16]. These two studies offer  
41 limited insight into what adaptations in hepatic molecular physiology underlie extreme energy  
42 turnover or its regulation. The UCP homolog was cloned from pectoralis (flight muscle) and its  
43 functional significance *in vivo* is unclear. The amino acid sequence of hummingbird insulin was  
44 found to be largely identical to that from chicken; however, birds are insulin insensitive and lack  
45 the insulin-regulated glucose transporter (GLUT) protein GLUT4, making the role of this  
46 hormone in the regulation of energy homeostasis in hummingbirds unknown [17–19].  
47  
48  
49  
50

51 Recently completed sequencing of the Anna's hummingbird (*Calypte anna*) genome provides a  
52 powerful new tool in the arsenal of biologists seeking to understand variation in metabolic  
53 physiology in hummingbirds and other groups [20]. Despite their extreme catabolic and anabolic  
54 capabilities, hummingbirds have the smallest genomes among birds [21] and, in general, have  
55 among the smallest vertebrate genomes [22]. Thus, it seems likely that understanding of  
56 transcriptional variation, overlaid on top of genetic variation, is crucial to understanding what  
57 makes these organisms such elite metabolic performers.  
58  
59  
60  
61  
62  
63  
64  
65

1  
2  
3  
4 To this end, we produced the liver transcriptome of the ruby-throated hummingbird, *Archilochus*  
5 *colubris*. Because many of the proteins involved in cellular metabolism are quite large, we  
6 collaborated with Pacific Biosciences to generate long-read sequences as these would enhance  
7 our ability to identify full coding sequences and multiple encoded isoforms. The primary  
8 advantage to the PacBio Iso-seq methodology is the capability for full-length transcript  
9 sequencing, rendering complete mRNA sequences without the need for assembly. This has  
10 been demonstrated in previous studies to dramatically increase detection of alternative splicing  
11 events [23]. Additionally, full-length sequences greatly enhance the likelihood of detecting novel  
12 or rare splice variants, which is crucial for fully characterizing the transcriptomes of lesser  
13 studied, non-model organisms such as the hummingbird.  
14  
15  
16

## 17 **Methods**

### 18 *Sacrifice and sample preparation*

19  
20  
21  
22 A wild adult male ruby-throated hummingbird (*Archilochus colubris*) was captured at the  
23 University of Toronto Scarborough using modified box traps on July 23rd 2013 at 8:15AM. At  
24 the time of its capture, the bird was aged as an “after hatch year” bird, meaning it was at least 1  
25 year old. Standard aging techniques make more precise aging of hummingbirds more than 1  
26 year old difficult [24]. The bird was housed in the University of Toronto Scarborough vivarium  
27 and fed NEKTON-Nectar-Plus (Nekton, Tarpon Springs, FL, USA) *ad libitum*, and sacrificed  
28 after *ad libitum* feeding at 1:22PM on July 16th 2014 (being 2+ years old). On arrival it weighed  
29 2.68g and at the time of sacrifice it weighed 3.11g. Tissues were sampled immediately after  
30 euthanization using RNase-free tools. Liver tissue was dissected out and homogenized at 4°C  
31 in 1 mL cold Tri Reagent using an RNase free glass tissue homogenizer and RNase free  
32 syringes of increasing needle gauge. We used 100 mg of tissue per 1 mL of Tri Reagent  
33 (Sigma-Aldrich, St. Louis, MO, USA), and chloroform extraction was performed twice to ensure  
34 quality. RNA was precipitated with isopropanol, centrifuged at 12000xg for 10 minutes, washed  
35 with ethanol 2x, vacuum dried at room temperature and eluted in RNase free water [25]. DNase  
36 I (Life Technologies) digestion and spin column cleanup were performed (Ambion Purelink RNA  
37 mini kit, Life Tech). RNA concentration and RIN were determined with RNA Bioanalyzer  
38 (Agilent). The sample used for Illumina sequencing was harvested using the same methods, but  
39 from a different animal. The bird was captured as described above on August 22nd, 2011 at  
40 10:50AM. At the time of capture, the bird was aged as “hatch year” and it weighed 2.93g. It was  
41 housed and sacrificed as described above on January 25th, 2016 at 10:50AM (being over 4  
42 years old). Sampled individuals were captured under the provisions of a Canadian Wildlife  
43 Service permit (# CA 0258) and all procedures were performed under the auspices of a  
44 University of Toronto Animal Use Protocol (# 20011649).  
45  
46  
47  
48  
49  
50  
51  
52

### 53 *Sequencing library preparation*

54  
55 Pacific Biosciences’s Iso-Seq sequencing protocol was followed to generate sequencing  
56 libraries [26]. Briefly, Clontech SMARTER cDNA synthesis kit with Oligo-dT primers was used to  
57 generate first and second-strand cDNA from polyA mRNA. After a round of PCR amplification,  
58 the amplified cDNA was size selected into 4 size fractions (1-2kb, 2-3kb, 3-6kb, and 5-10kb) to  
59 prevent preferential small template sequencing, using the BluePippin (0.75% agarose external  
60  
61  
62  
63  
64  
65

1  
2  
3  
4 marker, Sage Sciences). Additional PCR cycles were used post size-selection to generate  
5 adequate starting material, and then SMRTbell hairpin adapters were ligated onto size-selected  
6 templates. Each of the 4 size fractions was sequenced on 10 SMRT Cells, for a total of 40  
7 SMRT Cells. Sequencing was performed by the JHU HiT Center using P6-C4 chemistry on the  
8 RSII sequencer. Illumina sequencing libraries were generated using Lexogen mRNA sense v2  
9 Illumina library preparation kit, and sequenced on a single rapid-run lane of Hiseq 4000  
10 2x100bp paired end, yielded 153M reads.  
11  
12

## 13 14 **Analysis Methods**

### 15 16 *Data processing, isoform clustering sorting and quality control of liver transcriptome*

17  
18 We performed initial data processing using SMRTanalysis 3.1 Iso-Seq pipeline employed using  
19 a DNANexus interface. From 40 SMRTcells, we produced 440.75 Gb of raw data, which was  
20 classified into 3.4 Gb of non-chimeric circular consensus (CCS) reads. CCS reads comprised  
21 1.23M full length, 1.27M non-full-length reads; reads were considered full-length if both 5' and 3'  
22 cDNA primers as well as the polyA tail signal were detected. Of the four size-selected bins, our  
23 average CCS length was 1533, 2464, 3650, and 5444 bp, respectively (Figure 1B). The Iso-Seq  
24 pipeline then performed isoform-level clustering (ICE) followed by final polishing using Arrow  
25 [27] to output high-quality (predicted accuracy  $\geq 99\%$ ), full-length, isoform consensus  
26 sequences. The Iso-Seq pipeline produced 238Mb of high quality consensus isoforms (HQD,  
27 94,724 reads), and 2Gb (712,210 reads) of low quality consensus isoforms (summary statistics  
28 Figure 1A). BLAST searches were then performed to remove putative contaminants, and coding  
29 sequence and protein translation was performed, resulting in 93K HQ and 680K LQ protein  
30 sequences. A summary of the analyses performed are displayed in Figure 2A-B, further details  
31 and settings can be found in Supplemental Methods, and data can be found in our GigaScience  
32 and Zenodo Databases [28,29].  
33  
34  
35  
36  
37

### 38 39 *Assessing transcriptome completion*

40  
41 To estimate the completeness of our liver transcriptome sequencing, we used both subsampling  
42 and gene diversity estimation, as well as BUSCO (BUSCO, RRID:SCR\_015008) [30], [31].  
43 BUSCO checks for essential single copy orthologs which should be present in a whole  
44 transcriptome dataset for any member of the given lineage. We used both Metazoan and Aves  
45 lineages (ortholog sets) to examine transcriptome completion (Figure 2C and Supplemental  
46 Table 1), and to ensure that completeness tracked across multiple data processing steps, we  
47 analyzed ASD (all sequence data), HQD (high quality data) and CCD (Cogent collapsed data).  
48 As expected, *Gallus gallus* and *Calypte anna* genome predicted transcriptomes were nearly  
49 complete for both Aves and Metazoan BUSCO sets, and our *A. colubris* transcriptome only  
50 captured around half of this diversity, likely due to our sample being a single tissue, collection  
51 time point and individual.  
52  
53  
54

55  
56 Our subsampling approach to estimating transcriptome completeness involved pulling subsets  
57 of the circular consensus reads dataset and BLASTing against the predicted *Calypte anna* gene  
58 set. We found that the number of unique genes detected began to saturate when reaching a  
59 90% subset of our data, suggesting that additional sequencing would not substantially  
60  
61  
62  
63  
64  
65



1  
2  
3  
4 contribute to transcriptome completion (Supplemental Figure 1). Lower expressed genes may  
5 not be detected, but that vast majority of annotated liver expressed genes are likely represented  
6 in our data.  
7

#### 8 *Agreement with established Anna's hummingbird genomes reveals general clade conservation*

9  
10 We aligned transcripts to the *Calypte anna* (Anna's hummingbird) genome using GMAP (GMAP,  
11 RRID:SCR\_008992) [32]. In order to validate transcript coverage and alignment throughout the  
12 multiple processing steps, we aligned using not only high quality isoforms (HQD), but also the  
13 full consensus isoform dataset (ASD) and gene families predicted by Cogent (CCD, methods in  
14 Supplemental methods and below).  
15  
16  
17

18 *Calypte anna* and *Archilochus colubris* are close relatives within the North American Bee  
19 (Mellisugini) clade of hummingbirds [33]; *A. colubris* is a member of the Caribbean Sheartails  
20 subclade and *C. anna* is of the *Calypte* subclade, which diverged from the from ancestral  
21 Mellisugini around early to mid Pliocene [34]. Given this fairly recent divergence, we expected  
22 alignment to perform well. We found an average alignment identity of 94.8%, with 87%  
23 transcripts uniquely mapping to the reference. Of the uniquely mapped, 73% covered >90% of  
24 the query sequence (alignment length and statistics, Supplemental Figure 2A, 2B),  
25 demonstrating high fidelity of aligned reads to reference. When ASD reads were parsed by  
26 number of reads of insert supporting each consensus cluster, it was found that generally,  
27 alignment identity was high regardless of number of supporting reads. A clear increase in mean  
28 alignment identity was found when two or more supporting reads were collapsed (Supplemental  
29 Figure 3).  
30  
31  
32  
33

34  
35 When GMAP was performed using only high quality isoforms (filtered for 2+ full-length  
36 supporting reads), alignment percentage was 95.7%, with 93.4% of transcripts mapping  
37 uniquely to the reference. The average mapped read length was 2411bp (HQD, 2617bp ASD),  
38 while the average predicted CDS length for *Calypte anna* was 1386bp. This being said, reads  
39 mapped with GMAP contain UTRs. When we predict just the CDS sequences for *A. colubris*  
40 using ANGEL[35], the mean length was 981bp. When we BLASTed the unaligned reads to  
41 whole NCBI database, they largely mapped back to *Calypte anna* (53%). This result suggests  
42 that our mapping parameters were too stringent to map these reads, error rate prevented  
43 alignment, unaligned regions are divergent enough between both hummingbirds to preclude  
44 alignment, or a combination of the above.  
45  
46  
47

#### 48 *Putative gene family prediction and reduction of transcript redundancy reduces data load while* 49 *maintaining transcript diversity*

50  
51 To assign transcripts to putative gene families, as well as cluster and eliminate redundant  
52 transcripts to produce a unique set of gene isoforms, we utilized the newly developed Cogent  
53 [36] pipeline. Cogent is specifically designed for transcriptome assembly in the absence of a  
54 reference genome, allowing for isoforms of the same gene to be distinctly identified from  
55 different gene families, which are defined as having more than two (possibly redundant)  
56 transcript copies. Of the 94,724 HQ consensus isoforms, 91,733 were grouped into 6,725 multi-  
57 transcript gene families (Figure 3A). The remaining 2,991 sequences were classified as putative  
58  
59  
60  
61  
62  
63  
64  
65

1  
2  
3  
4 single-isoform genes, or “orphans”. Reconstructed contigs were then applied in place of a  
5 reference (or *de novo* clustering) to reduce redundant transcripts in the original HQD dataset.  
6 From this approach, we were able to reduce our HQ dataset to 14,628 distinct transcript  
7 isoforms and 2990 orphan isoforms, for a total of 17,618 isoform sequences (18% of the  
8 original). Due to the use of HQD only transcripts (2 full length reads and estimated accuracy  
9 >99%), and constraints of transcript collapse, a number of additional isoforms were likely lost in  
10 filtering and collapse, reducing transcript diversity. However, without sufficient supporting data  
11 the trade-off between between gene diversity and reliability led us to choose reliability. Future  
12 studies should examine whether transcript “rescue” from low quality datasets is possible with  
13 Illumina validation or additional consensus generation strategies.  
14  
15  
16  
17

18 Cogent collapsed data is further summarized and most abundant transcripts are detailed in  
19 Supplemental Table 2. An average of 1.53 isoforms was found per gene family (Figure 3B), with  
20 2624, or 27.4% of the gene families having more than one isoform, including “orphans”. While  
21 other studies have found more isoforms per locus, for example 6.56 in *Zea mays* [37], that study  
22 multiplexed six plant tissues, whereas a lower complexity is to be expected with single tissue  
23 analysis. This dataset (Cogent collapsed data, or CCD) was also mapped onto the *Calypste anna*  
24 genome assembly [38], to demonstrate the effectiveness of this method in reducing transcript  
25 redundancy and classifying isoforms (Figure 3C). Cogent gene families were polished using  
26 Illumina short read RNAseq data and the error correction algorithm Pilon [39] (Supplemental  
27 Methods) to obtain higher accuracy reads.  
28  
29  
30

### 31 *Orthologous gene pair predictions and GO annotation show putative unique hummingbird* 32 *orthologs* 33 34

35 To examine protein sequence similarity and divergence between *Archilochus colubris* and other  
36 avian species, we used OrthoMCL (OrthoMCL DB: Ortholog Groups of Protein Sequences,  
37 RRID:SCR\_007839), which generates reciprocal best hits from comparison species using  
38 BLAST all-vs-all, then clustering to group orthologous sequences for each pair of organisms  
39 [40]. OrthoMCL protein sequences were predicted using ANGEL[35], and 119,292 high quality  
40 sequences were put into this analysis. We compared our ruby-throated hummingbird,  
41 *Archilochus colubris*, to five other birds: *Calypste anna* (Anna’s hummingbird) fellow member of  
42 the bee clade of hummingbirds, *Chaetura pelagica* (chimney swift) the closest available  
43 outgroup species to the hummingbird clade, and other bird species for which relatively well-  
44 annotated genomes and/or transcriptomes are available, *Gallus gallus* (chicken), *Taeniopygia*  
45 *guttata* (zebra finch), and *Melopsittacus undulatus* (budgerigar), as well as *Homo sapiens*  
46 (human), and *Alligator mississippiensis* (American alligator). Algorithm parameters and data  
47 accession numbers are presented in Supplemental methods.  
48  
49  
50  
51  
52

53 A matrix of ortholog pairings, with duplicate ortholog hits removed, shows the number of  
54 orthologous sequences for each species pair (Supplemental Table 3). Orthologs shared  
55 between ruby-throated hummingbird and a subset of the other species analyzed are illustrated  
56 in Figure 4A. Unsurprisingly, the largest amount of orthologs which pair closely to only one  
57 species, i.e., 1:1 orthologs, were found between Anna’s and Ruby-throated hummingbird.  
58 Surprisingly, the second-largest set was between chicken and ruby-throated hummingbird, as  
59  
60  
61  
62  
63  
64  
65

1  
2  
3  
4 opposed to its closest outgroup species, *Chaetura pelagica*. This is likely due to the  
5 completeness of chicken transcriptome annotation, as chicken is the most well-studied avian  
6 species. Of the 596 unpaired *A. colubris* protein sequences, 190 paired most closely with  
7 *Calypte anna* when compared using BlastP and the majority of matches output (559/594) were  
8 less than 50 AA, only a fraction of the average sequence length.  
9

10  
11 In order to more closely examine the identity of orthologs in related hummingbird species, gene  
12 ontology (GO) annotation was performed on the set of orthologs which were shared between  
13 *Calypte anna* and *Archilochus colubris*, but not by the other birds included in the OrthoMCL  
14 analysis. This set of 2,376 protein sequences was examined using BlastP and GO analysis  
15 performed by Panther [41,42]. Additional datasets used for GO comparison included 1:1  
16 orthologs for *Gallus gallus* and *A. colubris* (518), and *A. colubris* and *Chaetura pelagica* (430),  
17 as well as whole transcriptome data from *C. pelagica* and the Cogent-collapsed dataset from  
18 our transcriptome (Supplemental Table 4, Figure 4B).  
19  
20  
21

22  
23 As the initial impetus for our investigation centered on the exceptional metabolism and  
24 energetics of hummingbirds, we focused our investigation on orthologs tagged as part of the  
25 “metabolic process (GO:0008152)” grouping. Of the 1444 orthologs identified in *Archilochus*  
26 *colubris* as part of this process grouping, 236 (16.3%) were unique to hummingbirds. Within this  
27 top-level grouping, the largest number of genes group under “primary metabolic processes”  
28 (GO:0044238). Of the 1240 orthologs identified within this grouping, 204 (16.3%) are identified  
29 as uniquely shared by our hummingbird species. Six GO biological processes are defined under  
30 the “primary metabolic processes”. Of these processes, the process with the highest proportion  
31 of identified *A. colubris* orthologs hitting as unique to the two hummingbird species is “lipid  
32 metabolic processes” (GO:0006629; 33 of 114 orthologs, 28.9%), which is significantly enriched  
33 relative to the comparative orthology databases of both chicken and human (Statistical  
34 overrepresentation test, Panther, [41], p-values given in Supplemental table 4). Because we  
35 considered it likely that an enrichment in lipid metabolic genes could be a result of our dataset  
36 being from liver tissue, we compared enrichment with that of the entire Cogent predicted gene  
37 set from the ruby-throated hummingbird transcriptome, and found no significant enrichment  
38 using the same tests (Supplemental table 4). Because 1:1 hummingbird orthologs are relatively  
39 more abundant in lipid metabolic genes than the sequences which were found to be highly  
40 homologous to one or more of the other species compared using OrthoMCL, we predict that  
41 lipid metabolic genes are more divergent from the other examined species than other classes of  
42 enzymes. Though this alone is not direct evidence of greater selection on proteins within that  
43 pathway, it is suggestive. If neutral sequence divergence is assumed to be randomly accrued  
44 throughout a species’ genome, then greater divergence in enzymes making up “lipid metabolic  
45 processes” suggests that closer examination of these proteins for evidence of functional, or  
46 even adaptive, divergence is warranted. A phylogenetically-informed analysis of ortholog  
47 divergence among taxa is necessary to establish a selection signature, which will become  
48 possible in the future with the advance of the B10K project [43] and larger numbers of avian  
49 species in GO databases.  
50  
51  
52  
53  
54  
55  
56  
57

58 Given the apparent sequence divergence among enzymes involved in “lipid metabolic  
59 processes” hinted at by orthology and ontology analyses, we elected to more closely examine  
60  
61  
62  
63  
64  
65

1  
2  
3  
4 enzymes comprising the lipogenic pathway. In liver, fatty acids can be synthesized via the *de*  
5 *novo* lipogenesis pathway using acetyl CoA as substrate. These newly synthesized fatty acids  
6 can then be esterified onto the glycerophosphate backbone to generate triglycerides via the  
7 glycerol-3-phosphate pathway of lipid synthesis. We predicted that key enzymes involved in  
8 these two pathways (Figure 5A) would be divergent in hummingbirds given their extraordinary  
9 metabolic demands. Eight enzymes involved in this pathway were examined for *Archilochus*  
10 *colubris*, *Calypte anna*, *Gallus Gallus*, *Chaetura pelagica*, *Alligator mississippiensis* and *Homo*  
11 *sapiens* (accession numbers and details given in Supplemental Table 5). Pairwise protein  
12 alignment scores are given in Supplemental Table 6 as well as illustrated in a heatmap shown in  
13 Figure 5B, and alignments in Supplemental Data 1. Interestingly, enzymes involved in *de novo*  
14 fatty acid synthesis share a higher degree of identity between examined organisms, whereas  
15 enzymes involved in triglyceride synthesis tend to be slightly less conserved (Figure 5A). Figure  
16 5B also shows normalized abundances of the enzymes of interest in our liver transcriptome  
17 dataset, revealing a high expression level of the rate-setting enzyme involved in *de novo*  
18 lipogenesis (*ACACA*; acetyl CoA carboxylase). In contrast to the cytosolic *ACACA* enzyme that  
19 uses acetyl-CoA as substrates for fatty acid synthesis, *MCAT* encodes a mitochondrial enzyme  
20 that uses malonyl-CoA as substrates for fatty acid synthesis. Much less is known about the  
21 *MCAT*-dependent pathway of fatty acid synthesis in mitochondria. Interestingly, *MCAT* has the  
22 lowest relative abundance in ruby throated hummingbird liver. The relative hepatic expression  
23 levels of triglyceride synthesis genes (e.g., *LPIN1* and *DGAT2*) are also much lower compared  
24 to genes involved in *de novo* lipogenesis (*ACACA* and *FASN*). It is important to note that most  
25 metabolic enzymes are tightly regulated. The relative levels of hepatic lipogenesis enzymes  
26 may vary greatly depending on the time of day and the physiological states (fast vs. fed) of the  
27 animals.  
28  
29  
30  
31  
32  
33  
34

35  
36 In order to further investigate degree of conservation between key hepatic lipogenesis enzymes  
37 in hummingbirds and comparative organisms, we performed conservation analysis and  
38 determined ratio of nonsynonymous to synonymous codon changes (dN/dS) as a metric of  
39 positive selection, using pairwise alignments followed by the CodeML module in PAML4[44].  
40 These ratios are given in Supplemental Table 6 and plotted in a heatmap in Figure 5B. A dN/dS  
41 score > 1 denotes genomic regions putatively undergoing positive selection. We found, in  
42 general, good conservation of these enzymes among species, with the exception of the 3' and  
43 5' ends of alignments. These often had an extended or retracted coding sequence in the case of  
44 hummingbirds and *C. pelagica*, which could be related to post-translational modification or  
45 selection on pathway regulation [45]. Surprisingly, terminal sequence length was variable even  
46 between *C. anna* and *A. colubris*, which both belong to the closely-related Bee hummingbird  
47 taxon [33]. Variation in 5' and 3' length may also be an effect of the different methodologies  
48 used to produce these sequences, RNA sequencing for *A. colubris*, *G. gallus*, and *H. sapiens*,  
49 and ORF prediction from genomic data for the other organisms examined. For example, we  
50 note in our analysis that *MCAT* appears more conserved between *A. colubris* and *H. sapiens*,  
51 than between *A. colubris* and *C. anna*, which could be due not to *A. colubris* actually being more  
52 similar to *H. sapiens*, but rather to ORF prediction oversights.  
53  
54  
55  
56  
57  
58

59 The averaged dN/dS values, while useful for comparison, can be misleading when considered  
60 over the entire gene, as 3' and 5' variation can overshadow conserved motifs, and pairwise  
61  
62  
63  
64  
65

1  
2  
3  
4 comparisons (Supplemental Data 1 and 2) are limited in scope. This type of analysis is ideal for  
5 very divergent sequences, but less informative for pairs of sequences that are highly similar  
6 [46]. Despite this, conservation analysis is still valuable and provides insights connecting  
7 nucleotide to amino acid information that alignments alone can miss. For example,  
8 lysophosphatidic acid acyltransferase (*ABHD5*), which functions primarily in phosphatidic acid  
9 biosynthesis, has reasonable protein alignment scores to all comparative organisms but also  
10 shows positive selection acting upon this gene relative to *Calypste anna*, swift, human and  
11 alligator, but not chicken (Figure 5B). This led us to more closely examine the coding sequence  
12 alignment, where we found that the bulk of differences in coding sequence were attributable to  
13 exon 1, with alignment largely becoming synchronous (with the exception of *H. sapiens*, which  
14 is widely divergent) by exon 2 and continuing through to the end of the transcript. Although the  
15 primary AB hydrolase-1 domain is very well conserved between species, these differences in  
16 exon 1 could be functionally significant, and honing down to regions of differentiation between  
17 comparative species gives us interesting starting points for future investigations, including the  
18 cloning and enzyme kinetics studies of *ABHD5*. Additionally, pairwise comparisons provide  
19 interesting observations, such as coding strand elongation in the 5' region in *A. colubris GPAM*  
20 (Supplemental Data 2). This information can be leveraged for future studies examining enzyme  
21 structure, function and evolution.  
22  
23  
24  
25  
26  
27

#### 28 *Transcriptome resource mining could provide functional genomic insights*

29

30  
31 Access to the transcriptome informs the investigation of biological processes and enables the  
32 formation of new hypotheses. This is exemplified by the serendipitous observation that  
33 hummingbird glucose transporter 2 (*GLUT2*) lacks a N-glycosylation site due to an asparagine  
34 to aspartic acid amino acid substitution. This missing glycosylation site was also seen in the  
35 available Anna's hummingbird genome. All class 1 glucose transporters studied in model  
36 vertebrates contain one N-glycosylation site located on the large extracellular loop of the protein  
37 [47]. In *GLUT2* the associated glycan interacts with the glycan-galectin lattice of the cell,  
38 stabilizing cell surface expression [48]. Removal of the N-glycan of *GLUT2* in rat pancreatic  $\beta$   
39 cells results in the sequestering of cell-surface *GLUT2* in lipid rafts and this sequestered *GLUT2*  
40 exhibits a reduction in glucose transport activity by approximately 25% [48]. This reduction in  
41 transport is thought to occur through interaction of the *GLUT* with lipid raft-bound stomatin  
42 [48,49]. In mammals, *GLUT2* serves a glucose-sensing role in the pancreatic  $\beta$  cells and is  
43 required for the regulation of blood glucose through insulin and glucagon [50]. The lack of N-  
44 glycosylation of *GLUT2* may contribute to observed high blood glucose concentration in  
45 hummingbirds [51].  
46  
47  
48  
49

50  
51 Another serendipitous observation was the highly abundant chitinase-like transcript noted from  
52 Illumina sequencing results. While humans express chitinase in the gut, but not the liver,  
53 chickens express the enzyme in both gut and liver, and other mammals (cows) express the  
54 enzyme only in the liver [52]. Suzuki et al. hypothesize that the ancestral state is expression of  
55 chitinase in both tissues. While the gut chitinase is used for digestion, expression in liver is  
56 believed to contribute to serum chitinase levels and to act as a defense against chitin-containing  
57 pathogens[52]; perhaps the second animal had an infection? The chitinase-like isoform in our  
58 dataset is highly homologous to the chicken liver chitinase-like transcript.  
59  
60  
61  
62  
63  
64  
65

#### *Re-use potential*

In conclusion, our results have leveraged cutting-edge technology to provide a compelling first direct look at the transcriptome of this incredible organism. By using PacBio sequencing, we have been able to generate full length cDNA transcripts from the hummingbird liver. Transcriptome data generated using the Iso-seq methodology, when coupled to recently developed sophisticated gene synthesis techniques [53], will allow simple generation of relevant isoforms for biochemical experiments. Some of the key metabolic enzymes identified from our work as being unique to either *A. colubris* or at most common to *C. anna* and *A. colubris* can now be quickly cloned and expressed. Follow up studies will allow for biochemical studies of proteins generated directly from our transcriptome data, measuring their enzymatic properties, e.g.  $k_{cat}$  or  $V_{max}$ , as compared to other avian or mammalian analogues [14,54,55]. Expressed proteins may also be used for structural biology studies, applying either x-ray crystallography or cryoEM to generate structural maps of the proteins, then examine how the structure compares to other analogues.

#### *Availability of supporting data*

Supporting datasets can be found on GigaDB [28]. Filtered fastq files of clustered CCS reads are deposited under SRA accession number SRP099041. Predicted Cogent gene families, coding sequence and annotations, peptide and untranslated region data are available via the Zenodo data repository [29].

#### *Availability of source code and requirements*

**Project name:** Ruby\_iseq

**Project home page:** <https://github.com/reworkman/hummingbird>

**Operating system:** Unix

**Programming language:** Bash, Python, R

**Other requirements:** BUSCO, GMAP, Blast+, ANGEL, CLUSTAL, Cogent, and their dependencies

**License:** MIT

#### **Acknowledgments**

Pacific Biosciences for reagents and SMRTcells as well as technical support. M. Schatz, E. Jarvis, J. Korlach, Y. Guo for discussion. HFSP grant #RGP0062/2016. Natural Sciences and Engineering Research Council of Canada Discovery Grant (#386466) to KCW.

#### **Disclosure Declaration**

W.T. and R.W. have received travel funds to speak at symposia organized by Pacific Biosciences. Bulk of reagents for IsoSeq were provided by Pacific Biosciences.

1  
2  
3  
4 **Figure legends**  
5

6 **Figure 1.** Transcriptome dataset quality control reveals good throughput, read length, and  
7 transcriptome completion. Average read lengths and isoform counts for 4 sequenced size  
8 fractions given in **A**, and read length distribution for all sequence data (ASD, is all sequence  
9 data, high quality (HQ) and low quality (LQ) isoforms) on x vs read counts on y plotted in **B**, with  
10 black line representing Mb data greater than read length. For example, at 2000bp, 4000Mb of  
11 sequence data was larger than 2000bp. **C.** BUSCO transcriptome assessment results displayed  
12 for *Archilochus colubris* (ruby-throated hummingbird, all sequence data ASD, high quality  
13 sequence data HQD), Cogent-collapsed data (CCD), *Calypte anna* (Anna's hummingbird),  
14 *Gallus gallus* Thomas (chicken single-tissue transcriptome[26]) illustrate transcriptome  
15 completion relative to predicted single copy ortholog datasets for both the Class Aves and  
16 Kingdom Metazoa.  
17  
18  
19  
20

21 **Figure 2.** Analysis pipeline details, as well as amount of data present at each step (in green  
22 text). **A** Raw sequence reads from a Pacbio RSII sequencer (bax.h5, bas.h5) were sorted into  
23 full and non-full length reads of insert (ROI) using a classification algorithm that identified full  
24 length reads with forward and reverse primers, as well as a poly-A tail. Iterative clustering for  
25 isoforms (ICE) was performed on full length reads, and non-full length reads were recruited to  
26 perform ARROW polished on the consensus isoforms. Polishing sorted reads into high and low-  
27 quality bins, and either high quality data (HQD), all sequence data (ASD) or both sets of data,  
28 were carried on to further applications (**B**). Applications include ORF and protein sequence  
29 generation from high quality (HQD) and low quality (LQD) consensus isoforms, alignment to *C.*  
30 *anna* reference with GMAP of both high quality data (HQD) and Cogent-collapsed data (CCD),  
31 detection of orthologous sequences (orth groups) using OrthoMCL, and prediction of gene  
32 families (gene fam) using Cogent. Numbers of available reads at each analysis step is displayed  
33 in green in each bubble.  
34  
35  
36  
37  
38

39 **Figure 3.** Reducing transcript redundancy and predicting gene families using Cogent software.  
40 **A.** Gene families predicted and classified by relationship to *Calypte anna* genome assembly  
41 shown, along with statistics for alignment using GMAP software which show excellent alignment  
42 to closely related hummingbird reference species *Calypte anna*. Cogent comparison cases  
43 highlight the relationships between predicted gene families and *C. anna* reference (column  
44 captioned "In ref"), and demonstrate the additional information given to an assembly by  
45 transcriptome information. Number of isoforms predicted per gene family (unigene) given in **B**  
46 shows relatively low isoform diversity in this tissue. **C** Alignment of the MATR3 gene  
47 demonstrates the redundancy reducing capabilities of the Cogent software, which was reduced  
48 from 11 semi-redundant reads to 3 unique isoforms using this pipeline.  
49  
50  
51  
52

53 **Figure 4.** Orthology analysis. The proteomes of five birds (Anna's hummingbird: *Calypte anna*,  
54 Zebrafinch: *Tinamus guttatus*, Chicken: *Gallus gallus*, Swift: *Chaetura pelagica*, and  
55 Budgeridger: *Melopsitticus undulatus*), one mammal (*Homo sapiens*) and one reptile (*Alligator*  
56 *mississippiensis*) were compared against *Archilochus colubris* using OrthoMCL to detect  
57 homologous sequences. A Venn diagram illustrating sequences with best reciprocal blast hits  
58 between the given species and *A. colubris* is shown in **A**. Bar chart illustrates  
59  
60  
61  
62  
63  
64  
65

1  
2  
3  
4 observed/expected ratios of metabolism enzymes (GO group: metabolic process 0008152) for  
5 comparison groups (statistical overrepresentation test) for selected OrthoMCL groups using  
6 Panther. Datasets input either include the entire proteome of target species (swift all, anna's all)  
7 or distinct set of homologs shared two groups (Ex. *A. colubris* + *C. anna* are homologs shared  
8 between these two species but not any of the other comparison groups). Asterisks denote  
9 significant overrepresentation of metabolic process proteins relative to expected baseline  
10 ( $p < 0.05$ )(**B**).  
11  
12  
13

14 **Figure 5.** Pathway analysis of key enzymes in hepatic lipogenesis. **A** An overview of the  
15 relationship between the investigated genes and their roles in triacylglycerol, phospholipid and  
16 fatty acid synthesis, **B** heat maps illustrating percent amino acid identity of these proteins  
17 relative to *Archilochus colubris* predicted sequences, abundances ( $\log_2(\text{reads per } 10000)$ )  
18 transformed) of their transcripts, and dN/dS (ratio of synonymous to nonsynonymous gene  
19 mutations). Taken together, these illustrate the complex relationships between target proteins  
20 and identity, conservation and abundance.  
21  
22  
23

#### 24 **References:**

- 25  
26 1. Suarez RK. Hummingbird flight: sustaining the highest mass-specific metabolic rates among  
27 vertebrates. *Experientia*. 1992;48:565–70.  
28
- 29 2. Chai P, Dudley R. Limits to flight energetics of hummingbirds hovering in hypodense and  
30 hypoxic gas mixtures. *J. Exp. Biol.* 1996;199:2285–95.  
31
- 32 3. Suarez RK, Lighton JR, Moyes CD, Brown GS, Gass CL, Hochachka PW. Fuel selection in  
33 rufous hummingbirds: ecological implications of metabolic biochemistry. *Proc. Natl. Acad. Sci.*  
34 *U. S. A.* 1990;87:9207–10.  
35
- 36 4. Chen CCW, Welch KC. Hummingbirds can fuel expensive hovering flight completely with  
37 either exogenous glucose or fructose. *Funct. Ecol.* 2014;28:589–600.  
38
- 39 5. Welch KC Jr, Altshuler DL, Suarez RK. Oxygen consumption rates in hovering hummingbirds  
40 reflect substrate-dependent differences in P/O ratios: carbohydrate as a “premium fuel.” *J. Exp.*  
41 *Biol.* 2007;210:2146–53.  
42
- 43 6. Baker HG. Sugar Concentrations in Nectars from Hummingbird Flowers. *Biotropica*.  
44 [Association for Tropical Biology and Conservation, Wiley]; 1975;7:37–41.  
45
- 46 7. Welch KC Jr, Chen CCW. Sugar flux through the flight muscles of hovering vertebrate  
47 nectarivores: a review. *J. Comp. Physiol. B. Springer*; 2014;184:945–59.  
48
- 49 8. Powers DR, Brown AR, Van Hook JA. Influence of normal daytime fat deposition on  
50 laboratory measurements of torpor use in territorial versus nonterritorial hummingbirds. *Physiol.*  
51 *Biochem. Zool.* 2003;76:389–97.  
52
- 53 9. Hou L, Verdirame M, Welch KC. Automated tracking of wild hummingbird mass and  
54 energetics over multiple time scales using radio frequency identification (RFID) technology. *J.*  
55 *Avian Biol.* Blackwell Publishing Ltd; 2015;46:1–8.  
56
- 57 10. Weidensaul S, Robinson TR, Sargent RR, Sargent MB, Poole A. Ruby-throated  
58  
59  
60  
61  
62  
63  
64  
65



- 1  
2  
3  
4 hummingbird (*Archilochus colubris*). Birds of North America Online (A. Poole, Editor). Cornell  
5 Lab of Ornithology, Ithaca, NY, USA. <http://bna.birds.cornell.edu/bna/species/204>. 2013;  
6
- 7 11. Carpenter FL, Hixon MA, Beuchat CA, Russell RW, Paton DC. Biphasic Mass Gain in  
8 Migrant Hummingbirds: Body Composition Changes, Torpor, and Ecological Significance.  
9 Ecology. Ecological Society of America; 1993;74:1173–82.  
10
- 11 12. Hou L, Welch KC Jr. Premigratory ruby-throated hummingbirds, *Archilochus colubris*, exhibit  
12 multiple strategies for fuelling migration. Anim. Behav. 2016;121:87–99.  
13
- 14 13. Hermier D. Lipoprotein metabolism and fattening in poultry. J. Nutr. 1997;127:805S – 808S.  
15
- 16 14. Suarez RK, Brownsey RW, Vogl W, Brown GS, Hochachka PW. Biosynthetic capacity of  
17 hummingbird liver. Am. J. Physiol. 1988;255:R699–702.  
18
- 19 15. Vianna CR, Hagen T, Zhang CY, Bachman E, Boss O, Gereben B, et al. Cloning and  
20 functional characterization of an uncoupling protein homolog in hummingbirds. Physiol.  
21 Genomics. 2001;5:137–45.  
22
- 23 16. Fan L, Gardner P, Chan SJ, Steiner DF. Cloning and analysis of the gene encoding  
24 hummingbird proinsulin. Gen. Comp. Endocrinol. 1993;91:25–30.  
25
- 26 17. Welch KC Jr, Allalou A, Sehgal P, Cheng J, Ashok A. Glucose transporter expression in an  
27 avian nectarivore: the ruby-throated hummingbird (*Archilochus colubris*). PLoS One.  
28 2013;8:e77003.  
29
- 30 18. Braun EJ, Sweazea KL. Glucose regulation in birds. Comp. Biochem. Physiol. B Biochem.  
31 Mol. Biol. 2008;151:1–9.  
32
- 33 19. Polakof S, Mommsen TP, Soengas JL. Glucosensing and glucose homeostasis: from fish to  
34 mammals. Comp. Biochem. Physiol. B Biochem. Mol. Biol. 2011;160:123–49.  
35
- 36 20. Jarvis ED, Mirarab S, Aberer AJ, Li B, Houde P, Li C, et al. Phylogenomic analyses data of  
37 the avian phylogenomics project. Gigascience. [gigascience.biomedcentral.com](http://gigascience.biomedcentral.com); 2015;4:4.  
38
- 39 21. Gregory TR, Andrews CB, McGuire JA, Witt CC. The smallest avian genomes are found in  
40 hummingbirds. Proc. Biol. Sci. [rspb.royalsocietypublishing.org](http://rspb.royalsocietypublishing.org); 2009;276:3753–7.  
41
- 42 22. Hughes AL, Hughes MK. Small genomes for better flyers. Nature. 1995;377:391.  
43
- 44 23. Abdel-Ghany SE, Hamilton M, Jacobi JL, Ngam P, Devitt N, Schilkey F, et al. A survey of  
45 the sorghum transcriptome using single-molecule long reads. Nat. Commun. 2016;7:11706.  
46
- 47 24. Pyle P. Identification Guide to North American Birds, Part I: Columbidae to Ploceidae: Peter  
48 Pyle: 9780961894023: Books - Amazon.ca [Internet]. [cited 2017 Oct 1]. Available from:  
49 <https://www.amazon.ca/Identification-Guide-North-American-Birds/dp/0961894024>  
50
- 51 25. Chomczynski P, Mackey K. Short technical reports. Modification of the TRI reagent  
52 procedure for isolation of RNA from polysaccharide- and proteoglycan-rich sources.  
53 Biotechniques. 1995;19:942–5.  
54
- 55 26. Thomas S, Underwood JG, Tseng E, Holloway AK, Bench To Basinet CvDC Informatics  
56 Subcommittee. Long-read sequencing of chicken transcripts and identification of new transcript  
57  
58  
59  
60  
61  
62  
63  
64  
65

1  
2  
3  
4 isoforms. PLoS One. 2014;9:e94650.  
5

6 27. Genomic Consensus [Internet]. Github. Available from:  
7 <https://github.com/PacificBiosciences/GenomicConsensus>  
8

9 28. Workman RE, Myrka AM, Tseng E, Wong GW, Welch KC, Timp W. Supporting data for  
10 "Single molecule, full-length transcript sequencing provides insight into the extreme metabolism  
11 of ruby-throated hummingbird *Archilochus colubris*". *GigaScience Database* 2018.  
12 <http://dx.doi.org/10.5524/100403>  
13

14 29. Workman RE, Myrka AM, Tseng E, Wong GW, Welch KC, Timp W. Single molecule, full-  
15 length transcript sequencing provides insight into the extreme metabolism of ruby-throated  
16 hummingbird *Archilochus colubris* [Data set]. Zenodo 2017.  
17 <http://doi.org/10.5281/zenodo.311651>  
18

19 30. Assessing genome assembly and annotation completeness with Benchmarking Universal  
20 Single-Copy Orthologs (BUSCO) [Internet]. Available from: <https://gitlab.com/ezlab/busco>  
21

22 31. Simão FA, Waterhouse RM, Ioannidis P, Kriventseva EV, Zdobnov EM. BUSCO: assessing  
23 genome assembly and annotation completeness with single-copy orthologs. *Bioinformatics*.  
24 2015;31:3210–2.  
25

26 32. Wu TD, Watanabe CK. GMAP: a genomic mapping and alignment program for mRNA and  
27 EST sequences. *Bioinformatics*. 2005;21:1859–75.  
28

29 33. McGuire JA, Witt CC, Altshuler DL, Remsen JV Jr. Phylogenetic systematics and  
30 biogeography of hummingbirds: Bayesian and maximum likelihood analyses of partitioned data  
31 and selection of an appropriate partitioning strategy. *Syst. Biol.* 2007;56:837–56.  
32

33 34. Licona-Vera Y, Ornelas JF. The conquering of North America: dated phylogenetic and  
34 biogeographic inference of migratory behavior in bee hummingbirds. *BMC Evol. Biol.*  
35 2017;17:126.  
36

37 35. Tseng E. Robust Open Reading Frame prediction (ANGLE re-implementation) [Internet].  
38 Available from: <https://github.com/PacificBiosciences/ANGEL>  
39

40 36. Coding Genome Reconstruction using Iso-Seq data [Internet]. Elizabeth Tseng. Available  
41 from: <https://github.com/Magdoll/Cogent>  
42

43 37. Wang B, Tseng E, Regulski M, Clark TA, Hon T, Jiao Y, et al. Unveiling the complexity of  
44 the maize transcriptome by single-molecule long-read sequencing. *Nat. Commun.*  
45 2016;7:11708.  
46

47 38. Gilbert, T, M, P; Jarvis, E, D; Li, B; Li, C; Mello, C, V; The Avian Genome Consortium;  
48 Wang, J; Zhang, G (2014): Genomic data of the Anna's Hummingbird (*Calypte anna*).  
49 *GigaScience Database*. <http://dx.doi.org/10.5524/101004>  
50

51 39. Walker BJ, Abeel T, Shea T, Priest M, Abouelliel A, Sakthikumar S, et al. Pilon: an  
52 integrated tool for comprehensive microbial variant detection and genome assembly  
53 improvement. *PLoS One*. 2014;9:e112963.  
54

55 40. Li L, Stoeckert CJ Jr, Roos DS. OrthoMCL: identification of ortholog groups for eukaryotic  
56  
57  
58  
59  
60  
61  
62  
63  
64  
65

1  
2  
3  
4 genomes. *Genome Res.* 2003;13:2178–89.  
5

6 41. Mi H, Muruganujan A, Casagrande JT, Thomas PD. Large-scale gene function analysis with  
7 the PANTHER classification system. *Nat. Protoc.* 2013;8:1551–66.  
8

9 42. Mi H, Huang X, Muruganujan A, Tang H, Mills C, Kang D, et al. PANTHER version 11:  
10 expanded annotation data from Gene Ontology and Reactome pathways, and data analysis tool  
11 enhancements. *Nucleic Acids Res.* 2017;45:D183–9.  
12

13 43. Zhang G, Rahbek C, Graves GR, Lei F, Jarvis ED, Gilbert MTP. Genomics: Bird sequencing  
14 project takes off. *Nature.* 2015;522:34.  
15

16 44. Yang Z. PAML 4: phylogenetic analysis by maximum likelihood. *Mol. Biol. Evol.*  
17 2007;24:1586–91.  
18

19 45. Jacob E, Unger R. A tale of two tails: why are terminal residues of proteins exposed?  
20 *Bioinformatics.* 2007;23:e225–30.  
21

22 46. Kryazhimskiy S, Plotkin JB. The population genetics of dN/dS. *PLoS Genet.*  
23 2008;4:e1000304.  
24

25 47. Joost HG, Thorens B. The extended GLUT-family of sugar/polyol transport facilitators:  
26 nomenclature, sequence characteristics, and potential function of its novel members (review).  
27 *Mol. Membr. Biol.* 2001;18:247–56.  
28

29 48. Ohtsubo K, Takamatsu S, Gao C, Korekane H, Kurosawa TM, Taniguchi N. N-Glycosylation  
30 modulates the membrane sub-domain distribution and activity of glucose transporter 2 in  
31 pancreatic beta cells. *Biochem. Biophys. Res. Commun.* 2013;434:346–51.  
32

33 49. Zhang JZ, Abbud W, Prohaska R, Ismail-Beigi F. Overexpression of stomatin depresses  
34 GLUT-1 glucose transporter activity. *Am. J. Physiol. Cell Physiol.* 2001;280:C1277–83.  
35

36 50. Thorens B, Mueckler M. Glucose transporters in the 21st Century. *Am. J. Physiol.*  
37 *Endocrinol. Metab.* 2010;298:E141–5.  
38

39 51. Beuchat CA, Chong CR. Hyperglycemia in hummingbirds and its consequences for  
40 hemoglobin glycation. *Comp. Biochem. Physiol. A Mol. Integr. Physiol.* 1998;120:409–16.  
41

42 52. Suzuki M, Fujimoto W, Goto M, Morimatsu M, Syuto B, Iwanaga T. Cellular expression of  
43 gut chitinase mRNA in the gastrointestinal tract of mice and chickens. *J. Histochem. Cytochem.*  
44 2002;50:1081–9.  
45

46 53. Kosuri S, Church GM. Large-scale de novo DNA synthesis: technologies and applications.  
47 *Nat. Methods.* 2014;11:499–507.  
48

49 54. Suarez RK, Welch KC Jr, Hanna SK, Herrera M LG. Flight muscle enzymes and metabolic  
50 flux rates during hovering flight of the nectar bat, *Glossophaga soricina*: further evidence of  
51 convergence with hummingbirds. *Comp. Biochem. Physiol. A Mol. Integr. Physiol.*  
52 2009;153:136–40.  
53

54 55. FernándezM.J., BozinovicF., SuarezR.K. Enzymatic flux capacities in hummingbird flight  
55 muscles: a “one size fits all” hypothesis. *Can. J. Zool.* 2011;89:985–91.  
56  
57  
58  
59  
60  
61  
62  
63  
64  
65

A]

| Size Fraction              | 1-2kb   | 2-3kb   | 3-6kb   | 5-10kb  | Total     |
|----------------------------|---------|---------|---------|---------|-----------|
| # of SMRTcells             | 10      | 10      | 10      | 10      | 40        |
| Reads of Insert (ROI)      | 688,069 | 591,050 | 735,670 | 625,194 | 2,639,983 |
| Avg length ROI (bp)        | 1533    | 2464    | 3650    | 5444    |           |
| ROI Yield (Mbp)            | 1055    | 1457    | 2685    | 3404    | 8601      |
| Filtered full length reads | 430,381 | 306,841 | 272,781 | 193,906 | 1,203,909 |
| # Consensus Isoforms       | 359,981 | 163,618 | 209,969 | 121,109 | 807,114   |
| HQ consensus isoforms      | 41,763  | 25,776  | 24,735  | 7,436   | 94,724    |
| % HQ                       | 11.60%  | 15.75%  | 11.78%  | 6.14%   | 11.74%    |
| Avg HQ length              | 1315    | 2329    | 3629    | 5491    |           |
| LQ consensus isoforms      | 321,101 | 135,415 | 186,523 | 113,162 | 712,210   |
| % LQ                       | 89.20%  | 82.76%  | 88.83%  | 93.44%  | 88.56%    |
| Avg LQ length              | 1503    | 2621    | 4170    | 6718    |           |

B]

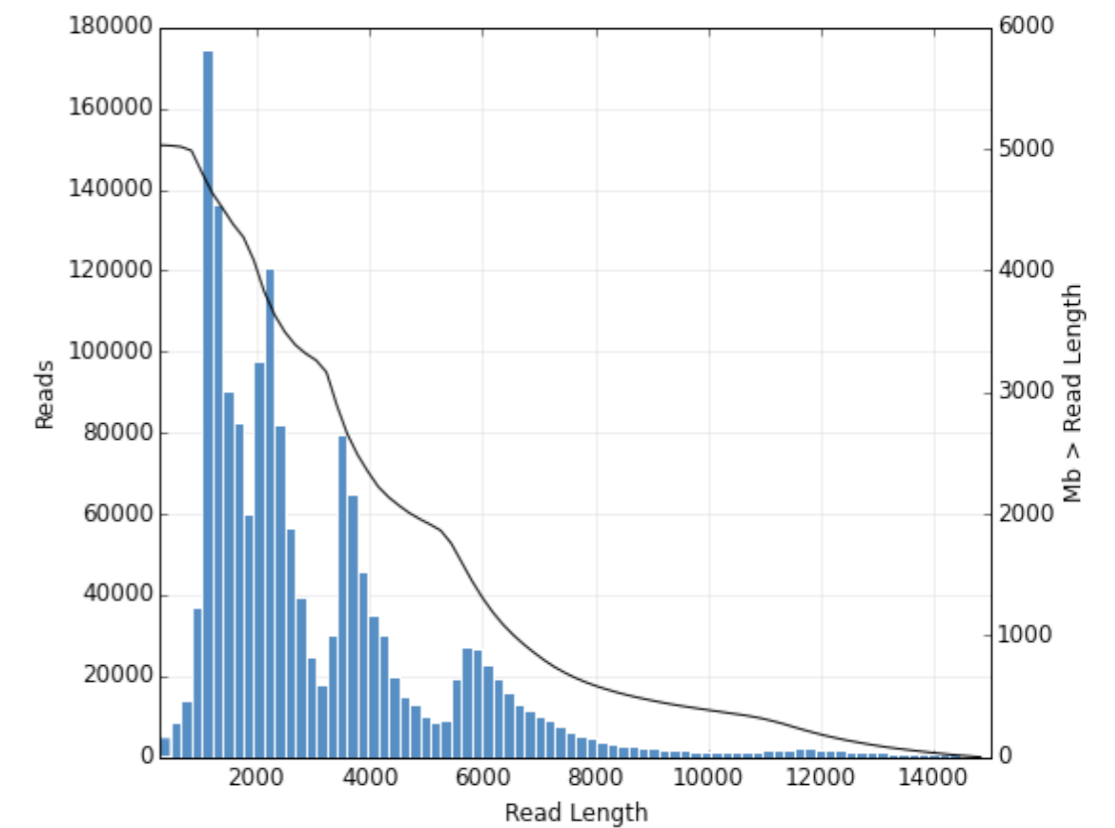

## C] BUSCO ASSESSMENT RESULTS

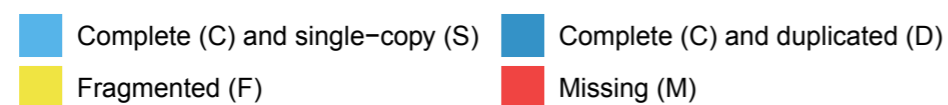

## Aves

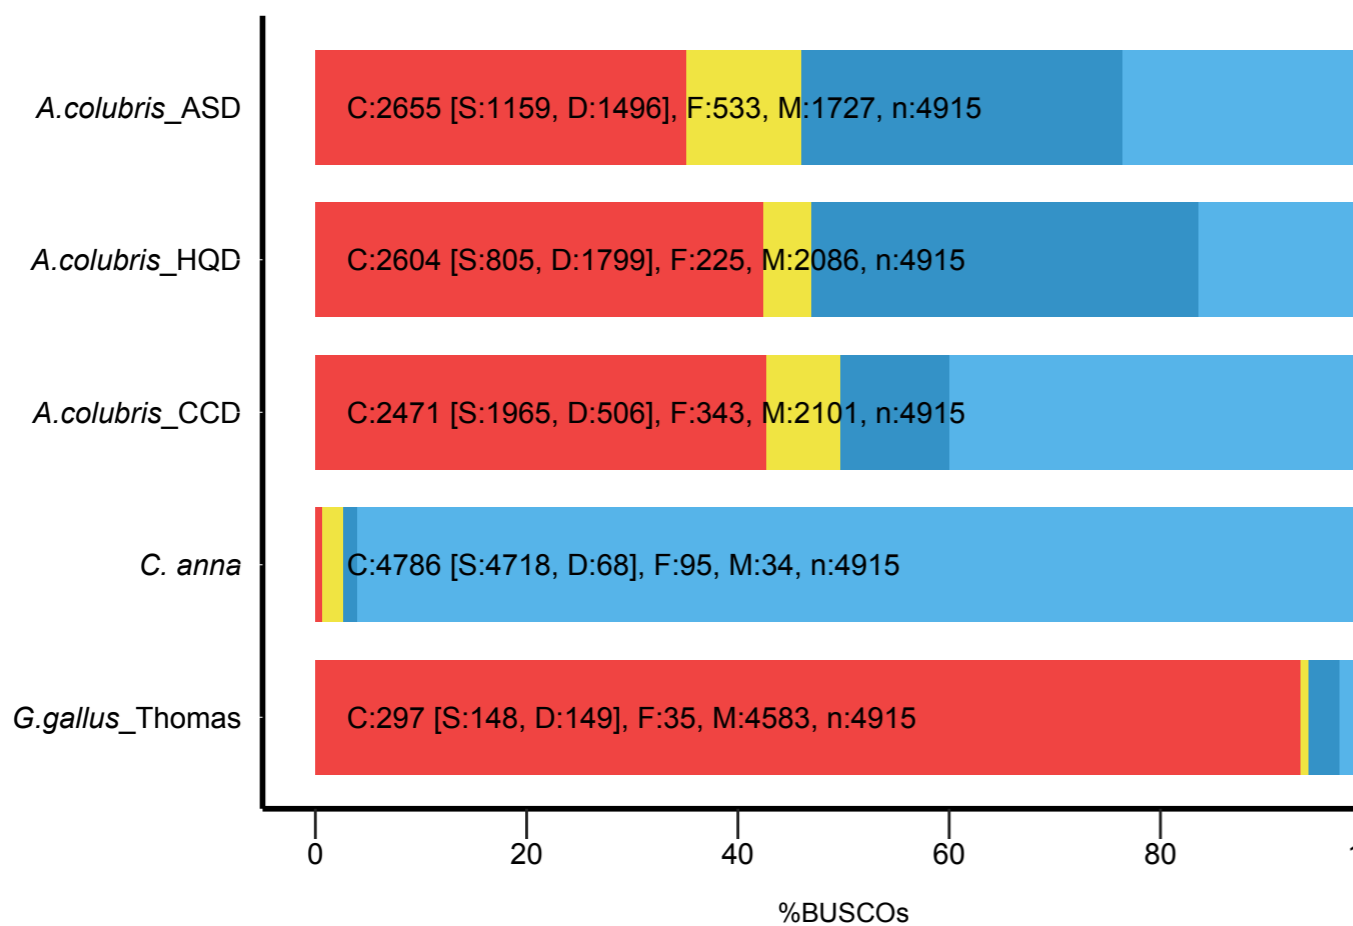

## Metazoan

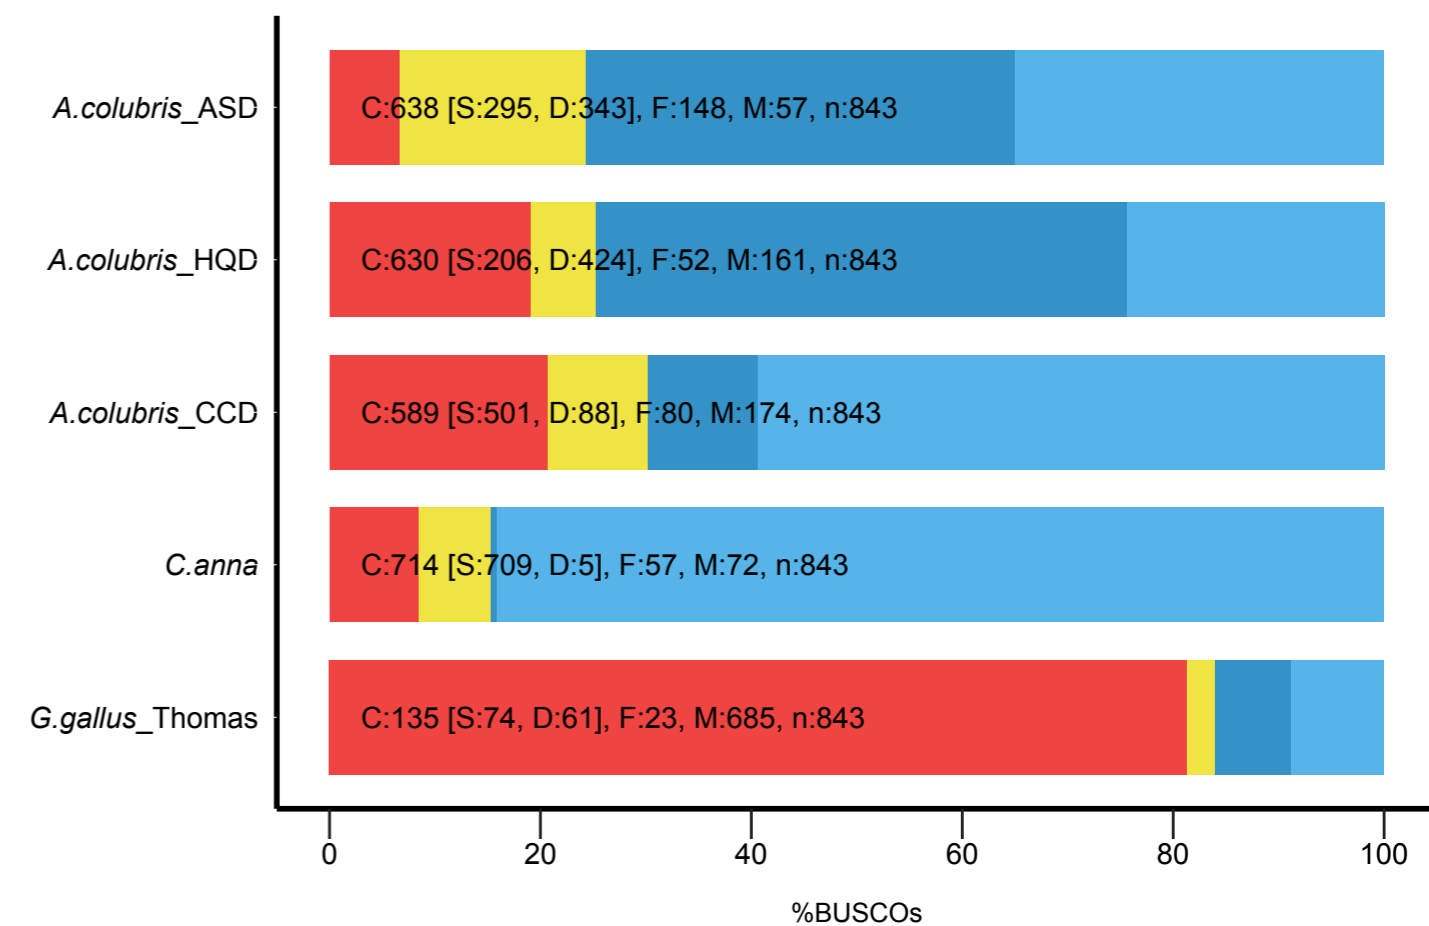

**A]**

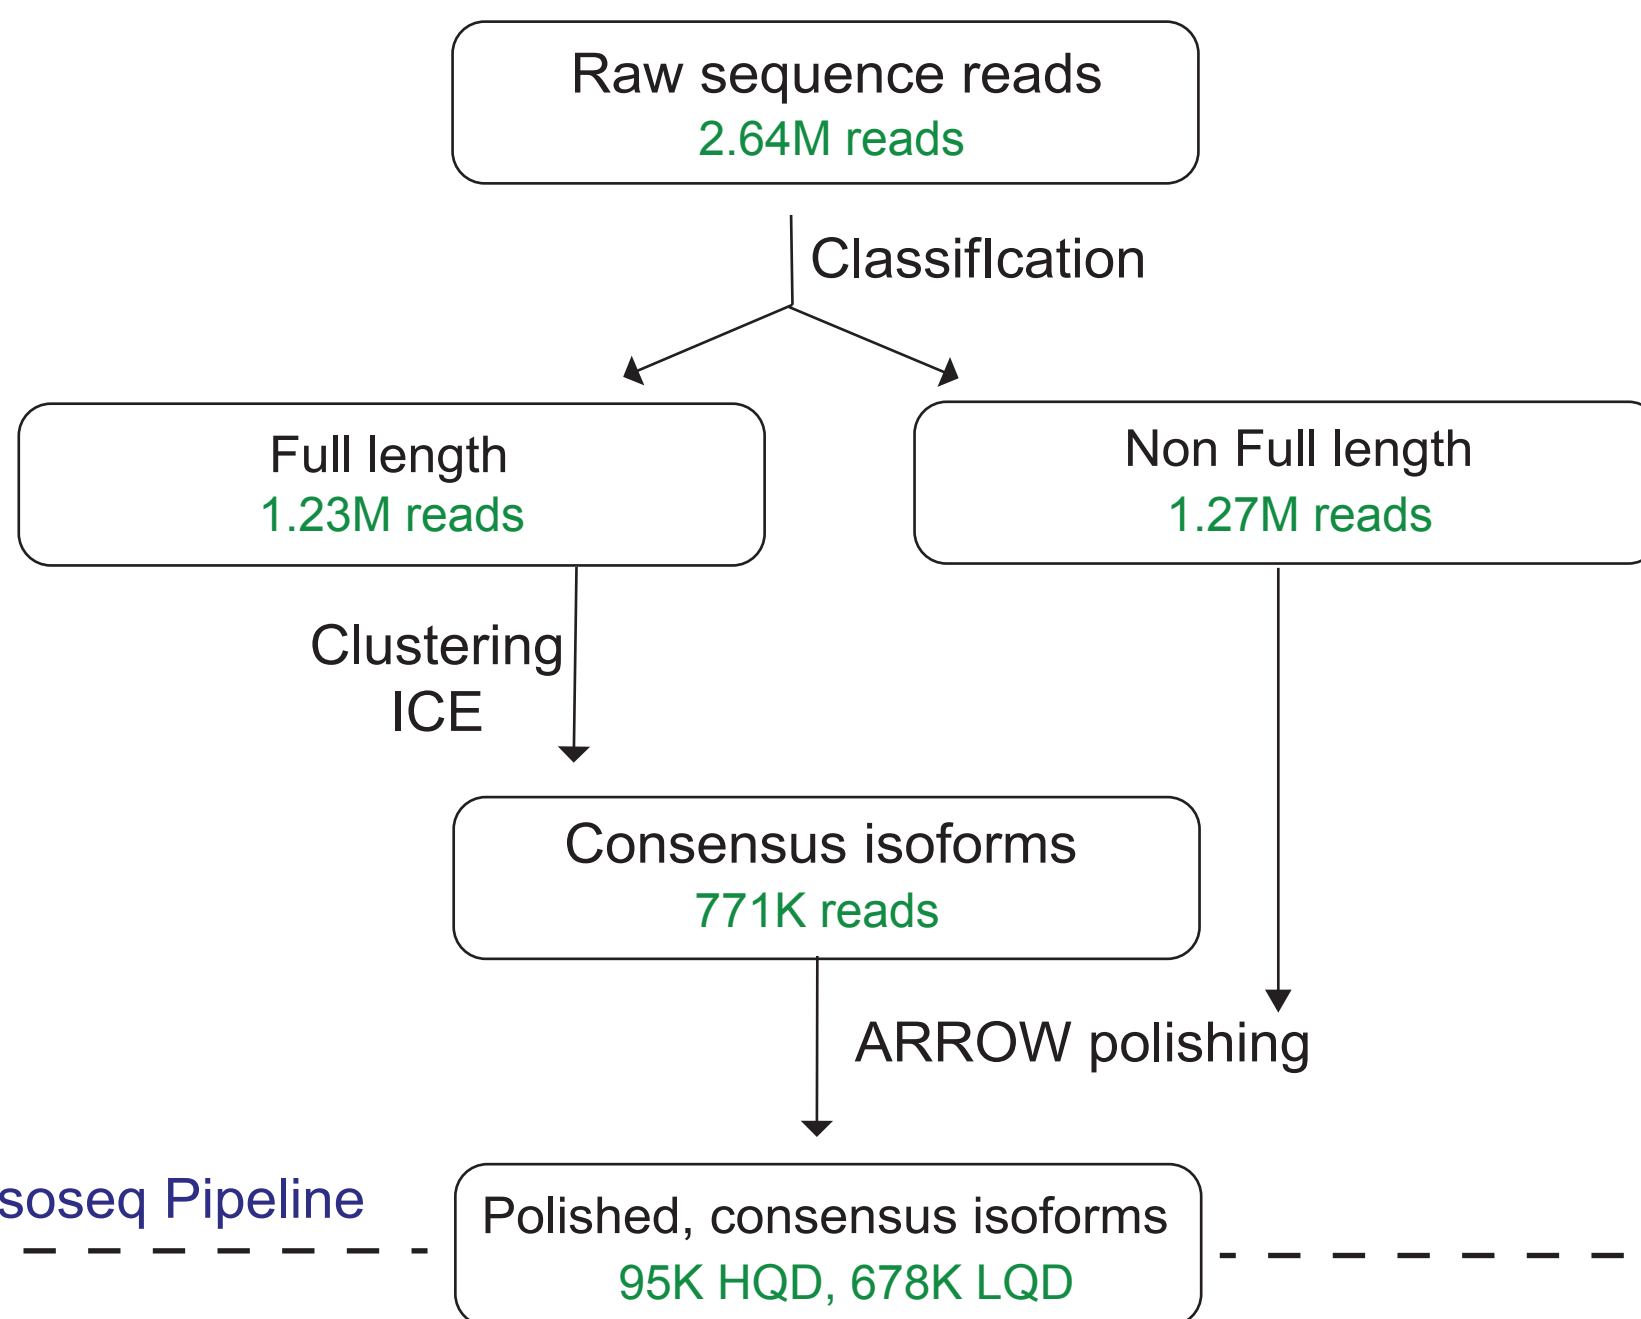

Pacbio SMRT Analysis Isoseq Pipeline

Applications

**B]**

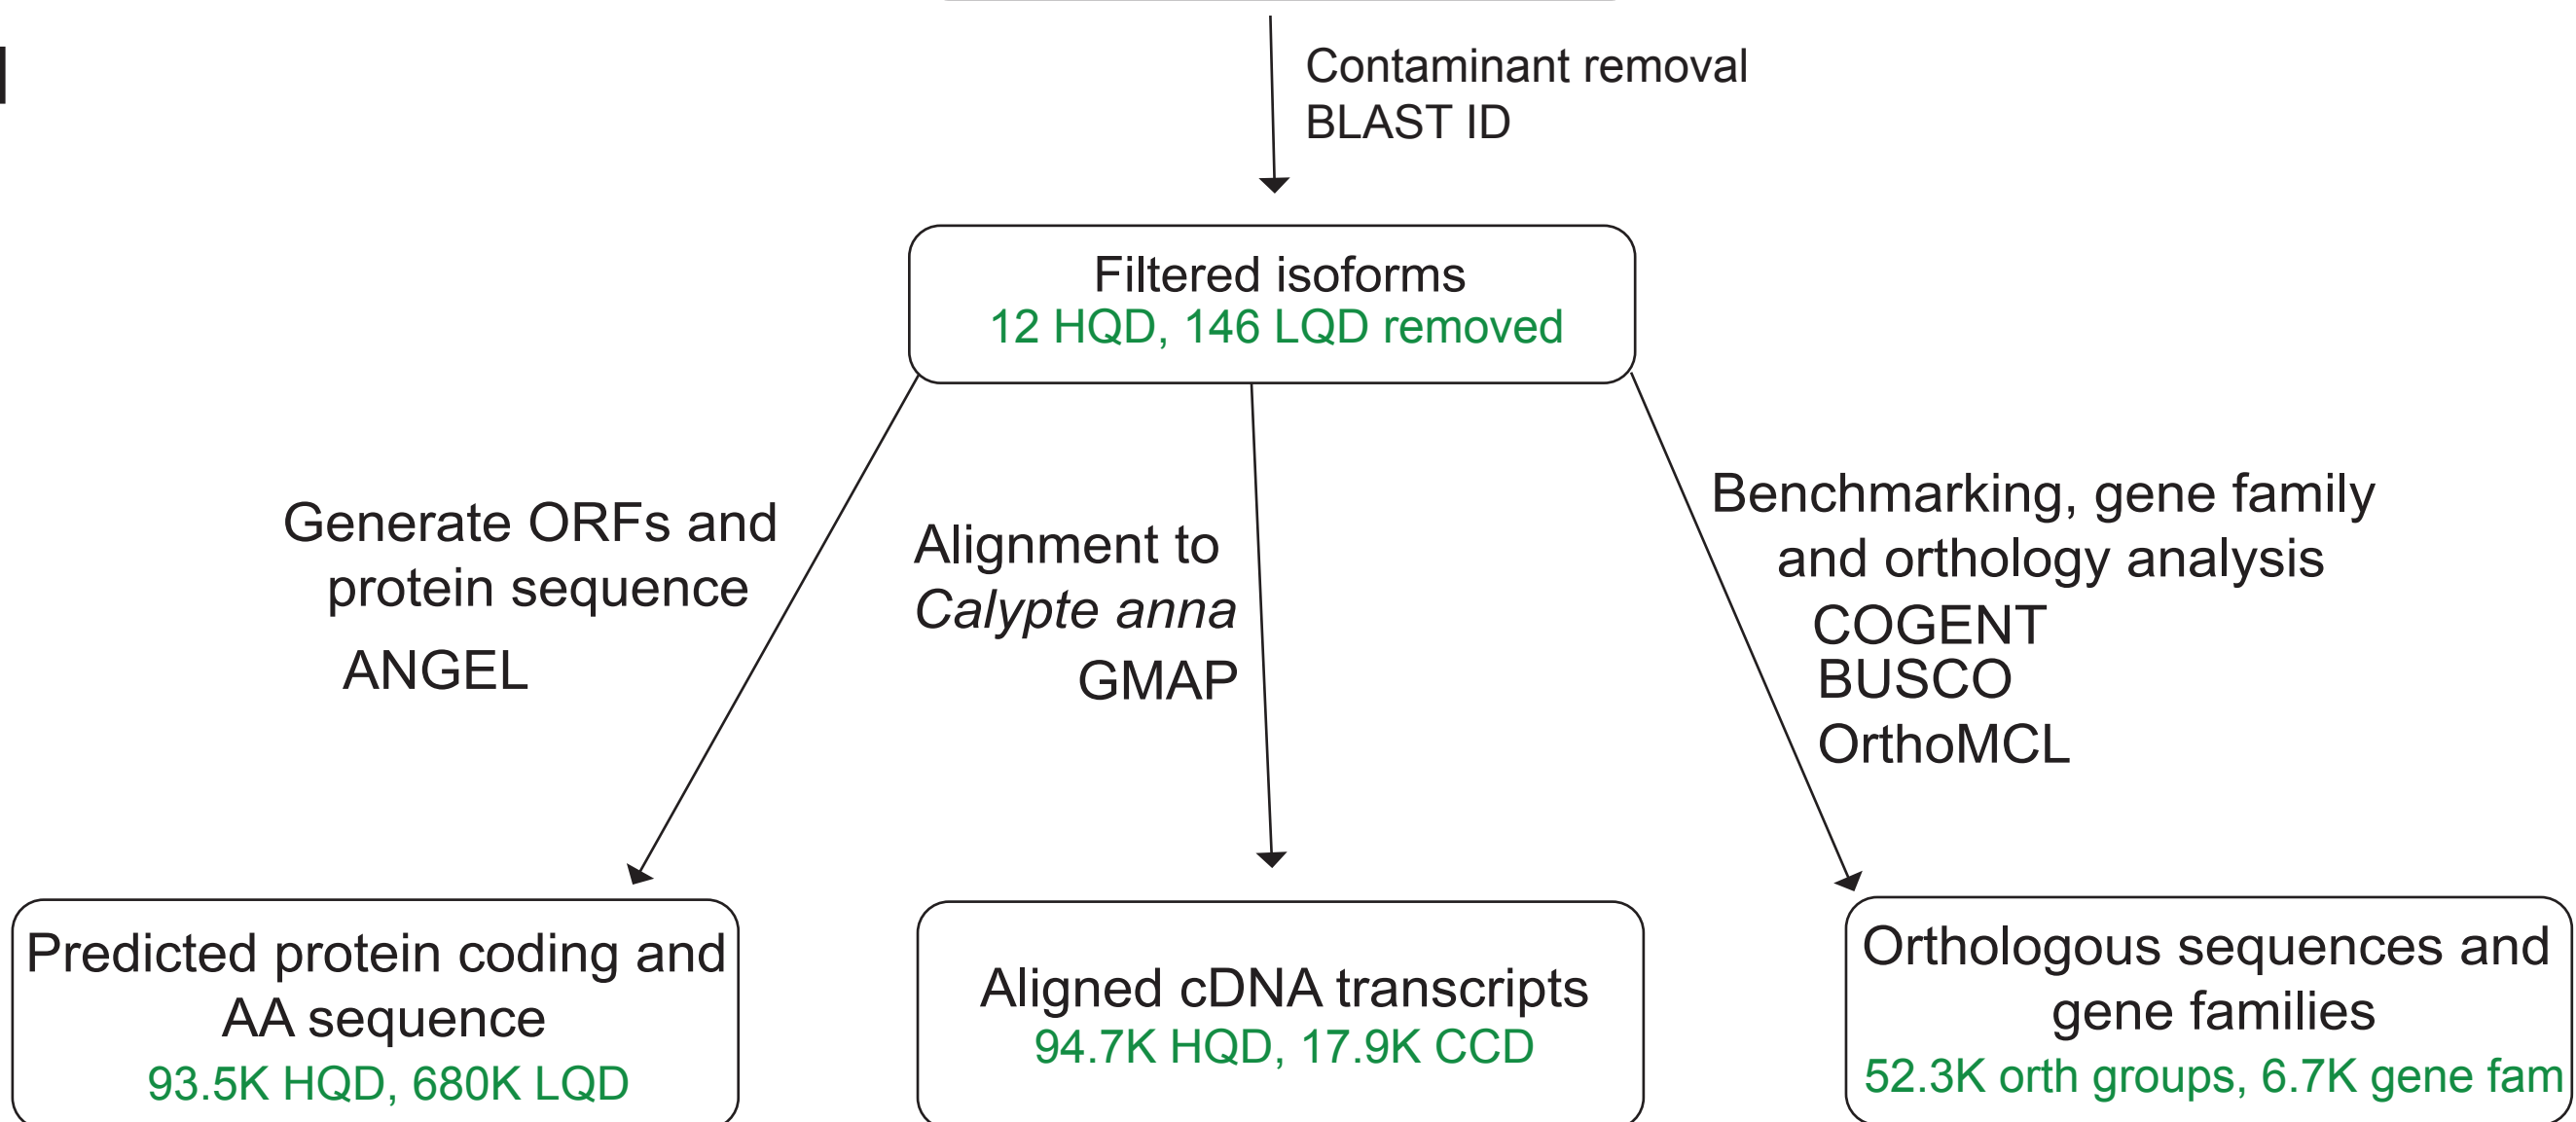

**A)**

| Clustering results                  | Counts    |         |           |
|-------------------------------------|-----------|---------|-----------|
| Total high quality (HQ) Isoforms    | 94724     |         |           |
| Total grouped by Cogent             | 91733     |         |           |
| Orphan seqs (likely single-isoform) | 2991      |         |           |
| Gene families predicted             | 6727      |         |           |
| Gene family alignment: GMAP         | Counts    | Percent |           |
| Unaligned                           | 1068      | 5.97%   |           |
| Multi-mapped                        | 2614      | 14.62%  |           |
| Uniquely Mapped                     | 15262     | 85.37%  |           |
| qCoverage = 100%                    | 10076     | 56.36%  |           |
| qCoverage >= 99%:                   | 14018     | 78.41%  |           |
| qCoverage >= 90%                    | 14559     | 81.44%  |           |
| Total number transcripts            | 17877     | 100.00% |           |
| Cogent comparison cases             | In Cogent | In Ref  | #families |
| Single gene locus                   | 1         | 1       | 5258      |
| Missing gene, possible broken       | 1         | >1      | 176       |
| Missing gene                        | 1         | 0       | 38        |
| Unresolvable to 1 contig            | >1        | 1       | 836       |
| Possible multi-loci gene            | >1        | >1      | 419       |
| Total gene families                 |           |         | 6727      |

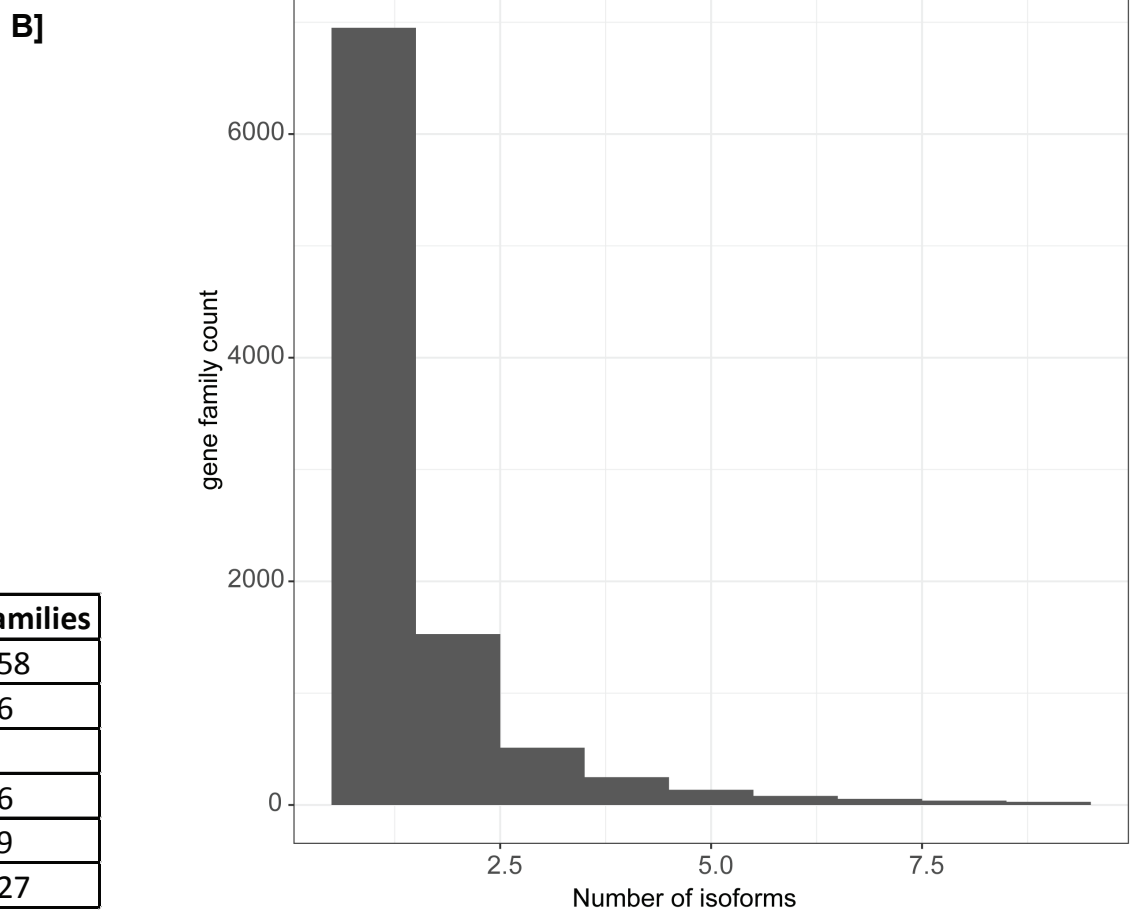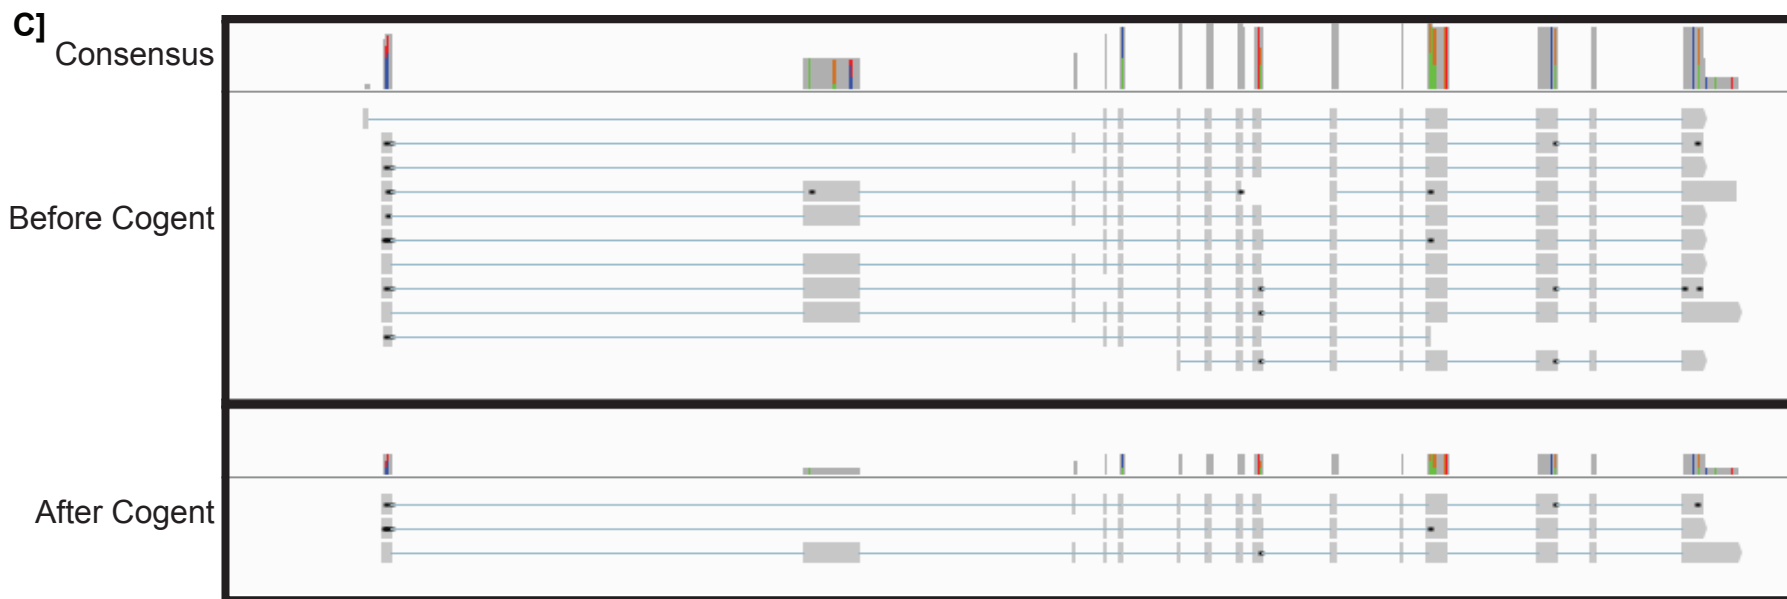

Cogent family 14912  
 MATR3 gene  
 FALCON assembly  
 scaffold 000168F  
 860,227-921,621

**A] OrthoMCL predicted orthologs to *A. colubris***

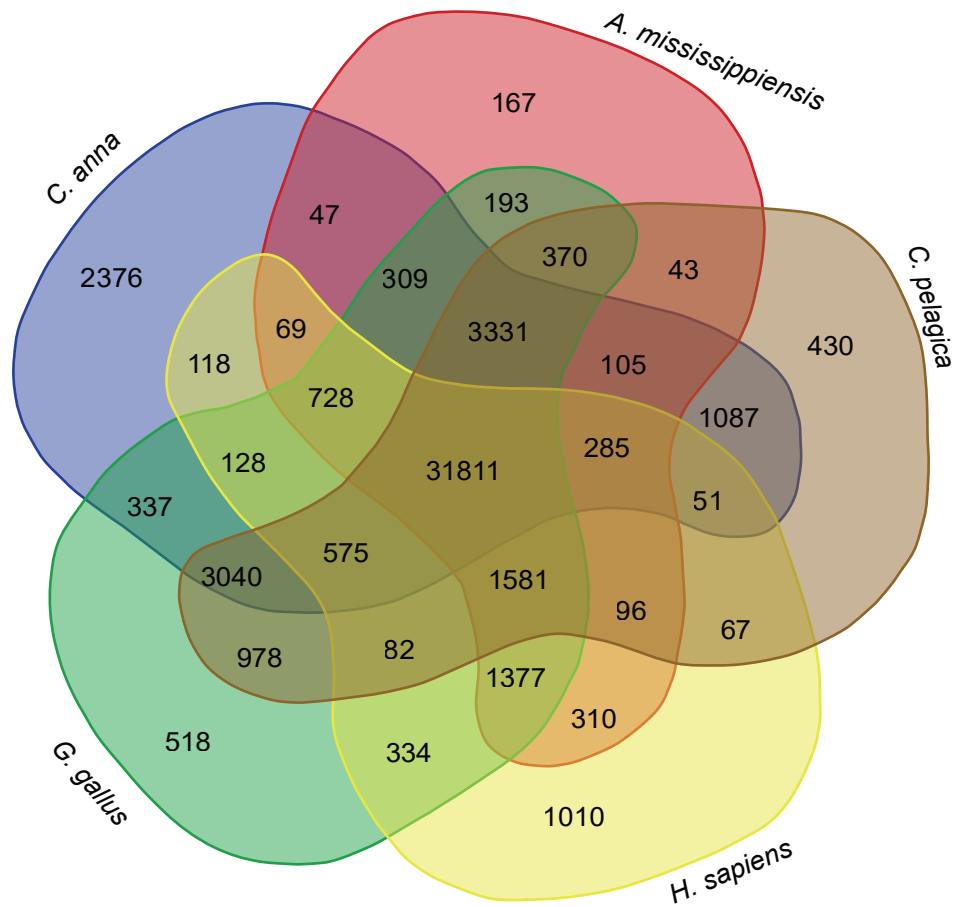

**B] Panther overrepresentation test: Metabolic process proteins abundance**

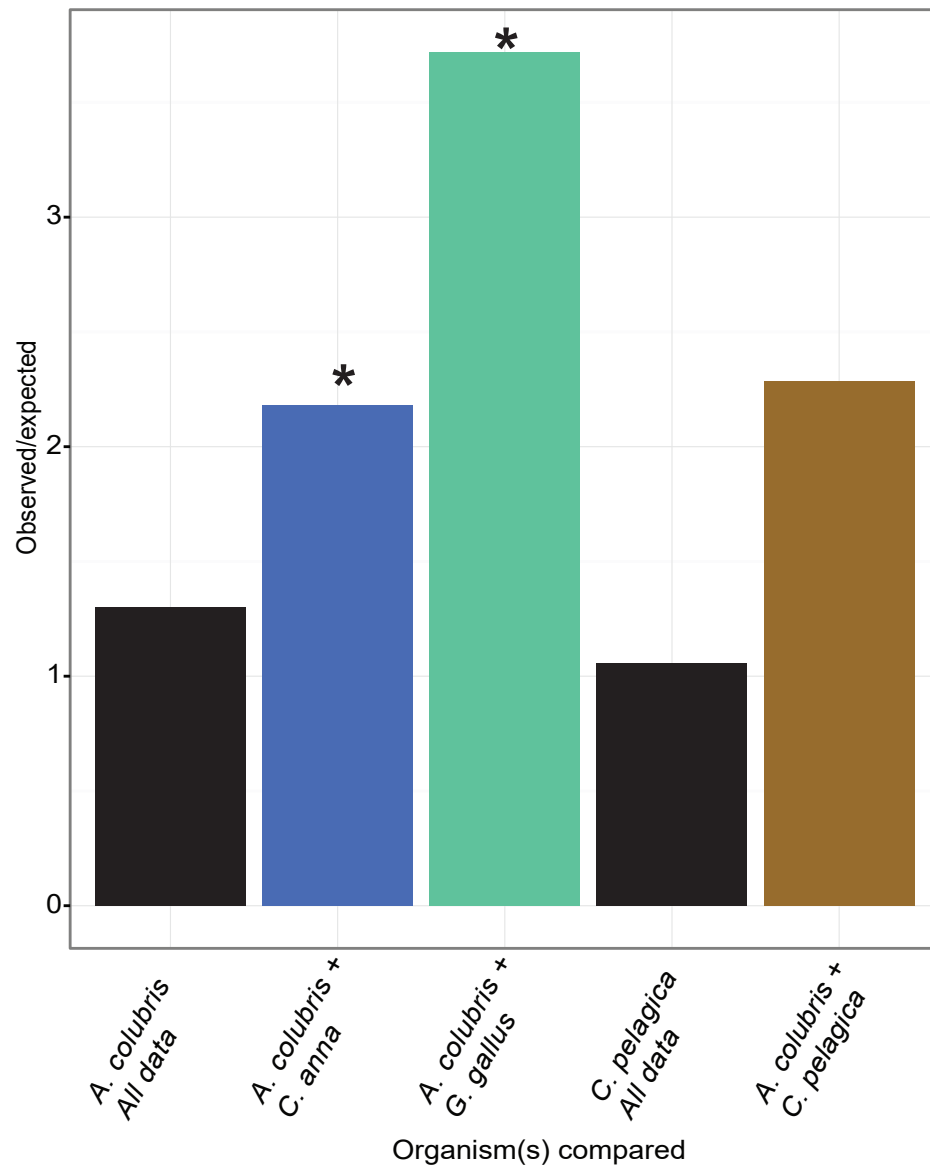

A]

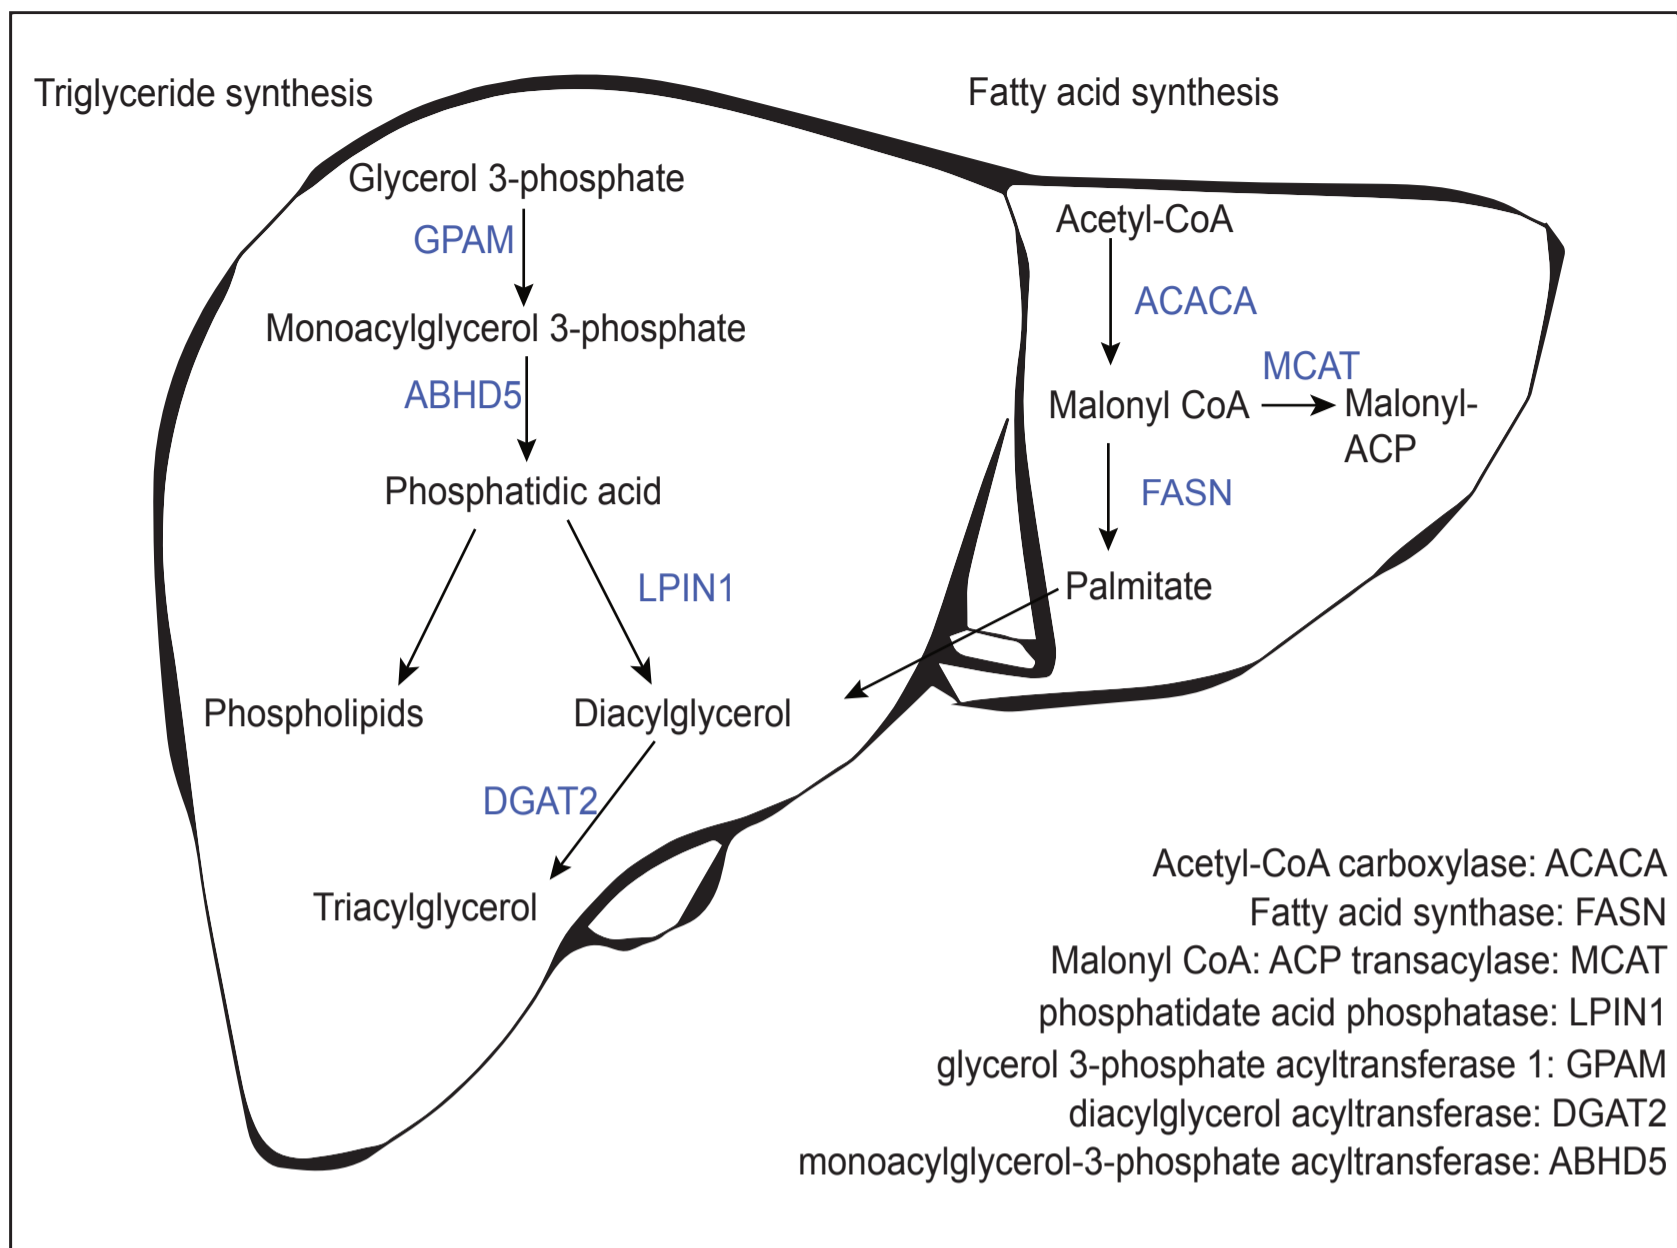

B] Protein alignment

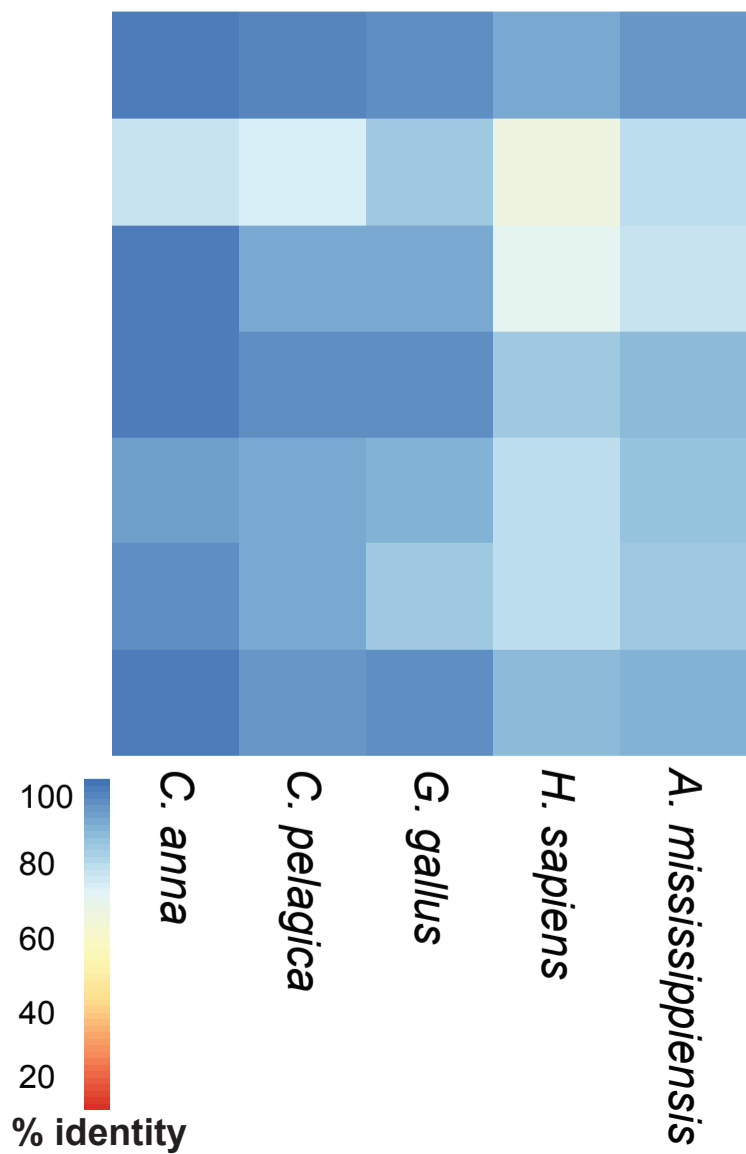

Abundance

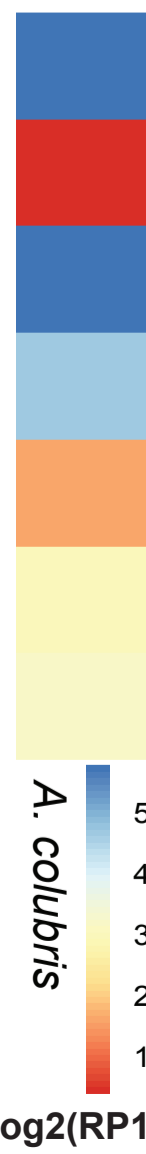

Conservation analysis

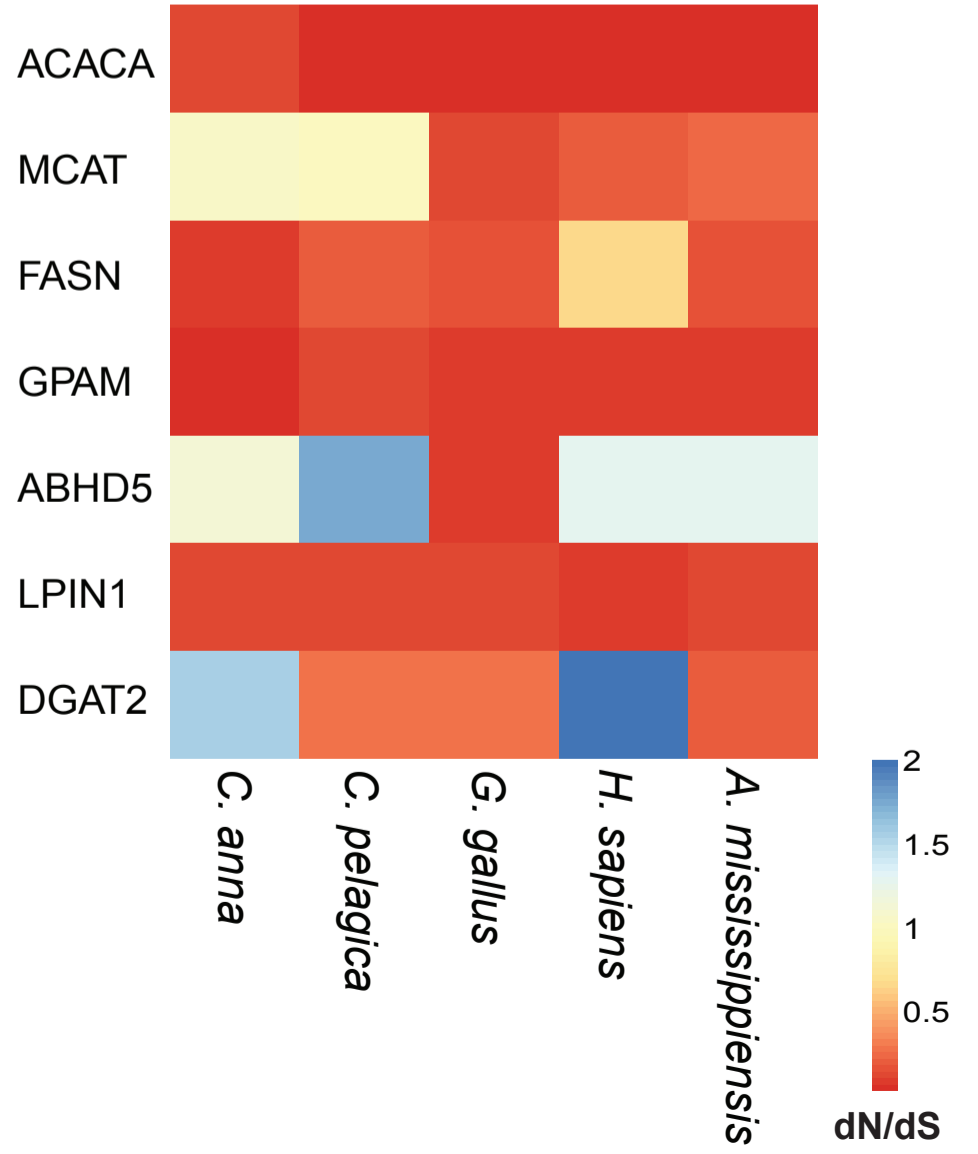



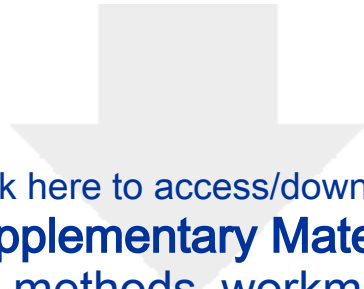

[Click here to access/download](#)

**Supplementary Material**

[Supplemental\\_methods\\_workman\\_180102.pdf](#)

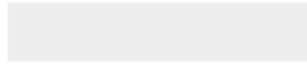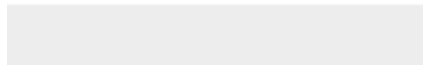



Click here to access/download  
**Supplementary Material**  
171009\_suppdata.pdf



Supplement: giy009_giga-d-17-00088_revision_3.pdf [file giy009_giga-d-17-00088_revision_3.pdf]
