# Supplementary material for: Single-molecule, full-length transcript sequencing provides insight into the extreme metabolism of the ruby-throated hummingbird Archilochus colubris
Source: PubMed Central journal article supplement (PMC5869288; doi:10.1093/gigascience/giy009), 2018-02-15
Supplement: giy009_response_to_reviewer_comments_revision_2.pdf [file giy009_response_to_reviewer_comments_revision_2.pdf]

## **Author's Response To Reviewer Comments**

---

As per editorial instructions, we have:

- 1) Included citations to the GigaDB and ZENODO datasets where appropriate
- 2) Removed the sentence "All other data available upon request"
- 3) Added the MIT license to our github repo
- 4) Added a statement to the manuscript involving the approval for research with animals (Canadian Wildlife Service permit and UToronto AUP).

2/5/18

- 5) Fixed the references 28, 29 and 38
